# Supplementary material for: Histone Modification Clocks for Robust Cross-Species Biological Age Prediction and Elucidating Senescence Regulation
Source: Research Square preprint supplement (doi:10.21203/rs.3.rs-6718936/v1), 2025-05-28
Supplement: Supplementary file 1 [file 6208bb825d5d53541cdaa5d9.xlsx]

## Sheet: ST-1 Dataset accession
BLUEPRINT			ENCODE			Roadmap
RUN_ID	EXPERIMENT_ ID	TISSUE	RUN_ID	EXPERIMENT_ID	TISSUE	RUN_ID	EXPERIMENT_ID	TISSUE
ERR1414162	EGAD00001002279	Blood	SRR16815741	ENCSR932QRC	Heart	SRR453220	ENCSR028NXO	Heart
ERR1414171	EGAD00001002279	Blood	SRR16815742	ENCSR932QRC	Heart	SRR578666	ENCSR557DFM	Heart
ERR1414157	EGAD00001002279	Blood	SRR16815743	ENCSR932QRC	Heart	SRR1045767	ENCSR928HSI	Heart
ERR1414161	EGAD00001002279	Blood	SRR16815744	ENCSR932QRC	Heart	SRR458430	ENCSR074ECR	Heart
ERR1414155	EGAD00001002279	Blood	SRR16815745	ENCSR932QRC	Heart	SRR449601	ENCSR150QXE	Heart
ERR1414165	EGAD00001002279	Blood	SRR16815746	ENCSR932QRC	Heart	SRR1045772	ENCSR676LPF	Heart
ERR1414163	EGAD00001002279	Blood	SRR16815747	ENCSR932QRC	Heart	SRR453221	ENCSR109RDK	Heart
ERR1414159	EGAD00001002279	Blood	SRR16815748	ENCSR932QRC	Heart	SRR1045782	ENCSR068CQX	Heart
ERR1414158	EGAD00001002279	Blood	SRR16808967	ENCSR342KXD	Heart	SRR1045784	ENCSR972RKX	Heart
ERR1414152	EGAD00001002279	Blood	SRR16808968	ENCSR342KXD	Heart	SRR458435	ENCSR503YOF	Heart
ERR1414164	EGAD00001002279	Blood	SRR16808969	ENCSR342KXD	Heart	SRR449607	ENCSR877RMK	Heart
ERR1414154	EGAD00001002279	Blood	SRR16808970	ENCSR342KXD	Heart	SRR643638	ENCSR616VTK	Heart
ERR1414166	EGAD00001002279	Blood	SRR16808971	ENCSR342KXD	Heart	SRR458442	ENCSR434MDA	Heart
ERR1414170	EGAD00001002279	Blood	SRR16808972	ENCSR342KXD	Heart	SRR578687	ENCSR142OBQ	Heart
ERR1414156	EGAD00001002279	Blood	SRR16808973	ENCSR342KXD	Heart	SRR449609	ENCSR230VEM	Heart
ERR1414160	EGAD00001002279	Blood	SRR13804501	ENCSR240GDT	Heart	SRR643645	ENCSR023ALV	Heart
ERR1414167	EGAD00001002279	Blood	SRR13804502	ENCSR240GDT	Heart	SRR458448	ENCSR111WGZ	Heart
ERR1043041	EGAD00001002282	Blood	SRR13804503	ENCSR240GDT	Heart	SRR496326	ENCSR671BOA	Heart
ERR1043008	EGAD00001002282	Blood	SRR13804504	ENCSR240GDT	Heart	SRR518299	ENCSR076CZA	Heart
ERR1043042	EGAD00001002282	Blood	SRR13804505	ENCSR240GDT	Heart	SRR1045797	ENCSR107RDP	Heart
ERR1043009	EGAD00001002282	Blood	SRR13804506	ENCSR240GDT	Heart	SRR449611	ENCSR377KDN	Heart
ERR1043040	EGAD00001002282	Blood	SRR13804507	ENCSR240GDT	Heart	SRR1045820	ENCSR548LZS	Heart
ERR1043011	EGAD00001002282	Blood	SRR13804508	ENCSR240GDT	Heart	SRR1045821	ENCSR548LZS	Heart
ERR1043010	EGAD00001002282	Blood	SRR13804329	ENCSR863BVD	Heart	SRR1045822	ENCSR791GCO	Heart
ERR465981	EGAD00001002283	Blood	SRR13804330	ENCSR863BVD	Heart	SRR1045823	ENCSR791GCO	Heart
ERR592884	EGAD00001002283	Blood	SRR13804331	ENCSR863BVD	Heart	SRR458453	ENCSR487BEW	Heart
ERR465982	EGAD00001002283	Blood	SRR13804332	ENCSR863BVD	Heart	SRR1045827	ENCSR086JMA	Heart
ERR465980	EGAD00001002283	Blood	SRR13804333	ENCSR863BVD	Heart	SRR449614	ENCSR442JTA	Heart
ERR466042	EGAD00001002283	Blood	SRR13804334	ENCSR863BVD	Heart	SRR449617	ENCSR176KNR	Heart
ERR465987	EGAD00001002283	Blood	SRR13804335	ENCSR863BVD	Heart	SRR458460	ENCSR596BHN	Heart
ERR466004	EGAD00001002283	Blood	SRR13804336	ENCSR863BVD	Heart	SRR458437	ENCSR042RIW	Intestine
ERR738689	EGAD00001002283	Blood	SRR10837822	ENCSR355GNZ	Heart	SRR518296	ENCSR179NYV	Intestine
ERR589964	EGAD00001002283	Blood	SRR10837823	ENCSR355GNZ	Heart	SRR486244	ENCSR213SMK	Intestine
ERR589991	EGAD00001002283	Blood	SRR10837824	ENCSR355GNZ	Heart	SRR518490	ENCSR321SZE	Intestine
ERR738669	EGAD00001002283	Blood	SRR10837825	ENCSR355GNZ	Heart	SRR486245	ENCSR340OPI	Intestine
ERR592883	EGAD00001002283	Blood	SRR10049618	ENCSR702OVJ	Heart	SRR578703	ENCSR417RFS	Intestine
ERR466054	EGAD00001002283	Blood	SRR10049619	ENCSR702OVJ	Heart	SRR1045811	ENCSR421HUB	Intestine
ERR465972	EGAD00001002283	Blood	SRR10049620	ENCSR702OVJ	Heart	SRR518293	ENCSR445RFF	Intestine
ERR466005	EGAD00001002283	Blood	SRR10049621	ENCSR702OVJ	Heart	SRR486243	ENCSR454VRA	Intestine
ERR589968	EGAD00001002283	Blood	SRR10388552	ENCSR668EVA	Heart	SRR518297	ENCSR504SKC	Intestine
ERR1230341	EGAD00001002297	Blood	SRR10388553	ENCSR668EVA	Heart	SRR1045768	ENCSR543CPW	Intestine
ERR1230228	EGAD00001002297	Blood	SRR10388554	ENCSR668EVA	Heart	SRR1045769	ENCSR543CPW	Intestine
ERR1230256	EGAD00001002297	Blood	SRR10388555	ENCSR668EVA	Heart	SRR1045770	ENCSR543CPW	Intestine
ERR1230327	EGAD00001002297	Blood	SRR10388556	ENCSR668EVA	Heart	SRR458432	ENCSR561YSH	Intestine
ERR1230347	EGAD00001002297	Blood	SRR10388557	ENCSR668EVA	Heart	SRR1045828	ENCSR636IDR	Intestine
ERR1230326	EGAD00001002297	Blood	SRR10388558	ENCSR668EVA	Heart	SRR518303	ENCSR737NLJ	Intestine
ERR466010	EGAD00001002317	Blood	SRR10388559	ENCSR668EVA	Heart	SRR518290	ENCSR751JOQ	Intestine
ERR738668	EGAD00001002317	Blood	SRR5832797	ENCSR443UYU	Heart	SRR518300	ENCSR782OZZ	Intestine
ERR589965	EGAD00001002317	Blood	SRR5832798	ENCSR443UYU	Heart	SRR449612	ENCSR792IJA	Intestine
ERR1232282	EGAD00001002317	Blood	SRR5832900	ENCSR593KDJ	Heart	SRR486246	ENCSR897TGR	Intestine
ERR589934	EGAD00001002317	Blood	SRR5832901	ENCSR593KDJ	Heart	SRR458438	ENCSR958DEW	Intestine
ERR592872	EGAD00001002317	Blood	SRR5833056	ENCSR854OXF	Heart	ENCFF782HDW	ENCSR795VEN	Liver
ERR364298	EGAD00001002317	Blood	SRR5833057	ENCSR854OXF	Heart	ENCFF536ZDD	ENCSR795VEN	Liver
ERR738680	EGAD00001002317	Blood	SRR16808501	ENCSR165BJO	Heart	ENCFF007GTB	ENCSR458RRZ	Liver
ERR466014	EGAD00001002317	Blood	SRR16808502	ENCSR165BJO	Heart	ENCFF654JFS	ENCSR458RRZ	Liver
ERR466015	EGAD00001002317	Blood	SRR16808503	ENCSR165BJO	Heart	ENCFF526GZR	ENCSR666FYM	Liver
ERR327587	EGAD00001002317	Blood	SRR16808504	ENCSR165BJO	Heart	ENCFF624UHE	ENCSR892MHG	Liver
ERR738673	EGAD00001002317	Blood	SRR16808505	ENCSR165BJO	Heart	ENCFF299RVY	ENCSR563YGF	Liver
ERR1232243	EGAD00001002317	Blood	SRR16808506	ENCSR165BJO	Heart	ENCFF422ACR	ENCSR218ZMU	Liver
ERR1232280	EGAD00001002317	Blood	SRR16808507	ENCSR165BJO	Heart	ENCFF342YDS	ENCSR608FDQ	Spleen
ERR466011	EGAD00001002317	Blood	SRR16808508	ENCSR165BJO	Heart	ENCFF290VNH	ENCSR432KIH	Spleen
ERR1232255	EGAD00001002317	Blood	SRR16814372	ENCSR468DOT	Heart	ENCFF139PIG	ENCSR249XEB	Spleen
ERR738677	EGAD00001002317	Blood	SRR16814373	ENCSR468DOT	Heart	ENCFF468VIY	ENCSR448FZC	Spleen
ERR364273	EGAD00001002317	Blood	SRR16814374	ENCSR468DOT	Heart	ENCFF716XUE	ENCSR078BHK	Spleen
ERR589966	EGAD00001002317	Blood	SRR16814375	ENCSR468DOT	Heart	ENCFF790UMC	ENCSR408ONP	Spleen
ERR327585	EGAD00001002317	Blood	SRR16814376	ENCSR468DOT	Heart	ENCFF024MIO	ENCSR235ZBF	Spleen
ERR364241	EGAD00001002317	Blood	SRR16814377	ENCSR468DOT	Heart	ENCFF611TRM	ENCSR466DUB	Spleen
ERR738679	EGAD00001002317	Blood	SRR16814378	ENCSR468DOT	Heart	ENCFF708GNB	ENCSR490YCL	Spleen
ERR327607	EGAD00001002317	Blood	SRR16814379	ENCSR468DOT	Heart	ENCFF313BQZ	ENCSR115TSA	Spleen
ERR364267	EGAD00001002317	Blood	SRR10388878	ENCSR459CKR	Heart	ENCFF063UMS	ENCSR170MAJ	Spleen
ERR364240	EGAD00001002317	Blood	SRR10388879	ENCSR459CKR	Heart	ENCFF772AWQ	ENCSR086XCT	Spleen
ERR466002	EGAD00001002317	Blood	SRR10388880	ENCSR459CKR	Heart	ENCFF882NUT	ENCSR421FPV	Spleen
ERR465999	EGAD00001002317	Blood	SRR10388881	ENCSR459CKR	Heart	ENCFF282DOJ	ENCSR582UTE	Stomach
ERR1232279	EGAD00001002317	Blood	SRR10838129	ENCSR613PPL	Heart	ENCFF341PPF	ENCSR257BCD	Stomach
ERR1232291	EGAD00001002317	Blood	SRR10838130	ENCSR613PPL	Heart	ENCFF957UUT	ENCSR885CMN	Stomach
ERR589950	EGAD00001002317	Blood	SRR10838131	ENCSR613PPL	Heart	ENCFF666EGF	ENCSR437QMD	Stomach
ERR466049	EGAD00001002317	Blood	SRR10838132	ENCSR613PPL	Heart	ENCFF669MHN	ENCSR437QMD	Stomach
ERR466051	EGAD00001002317	Blood	SRR5833002	ENCSR793PLF	Heart	ENCFF549JDN	ENCSR527BFF	Stomach
ERR327600	EGAD00001002317	Blood	SRR5833003	ENCSR793PLF	Heart	ENCFF260GCX	ENCSR245QTD	Stomach
ERR466033	EGAD00001002317	Blood	SRR5833004	ENCSR793PLF	Heart	ENCFF287IUD	ENCSR129NCV	Stomach
ERR466064	EGAD00001002317	Blood	SRR5833005	ENCSR793PLF	Heart	ENCFF271RIT	ENCSR001SHB	Stomach
ERR364297	EGAD00001002317	Blood	SRR5833196	ENCSR988JLN	Heart	ENCFF940AVQ	ENCSR552MZH	Stomach
ERR738674	EGAD00001002317	Blood	SRR5833197	ENCSR988JLN	Heart	ENCFF682FRA	ENCSR639RKZ	Stomach
ERR327606	EGAD00001002317	Blood	SRR5833198	ENCSR988JLN	Heart	ENCFF868WKG	ENCSR269GMC	Stomach
ERR592873	EGAD00001002317	Blood	SRR5833199	ENCSR988JLN	Heart
ERR466071	EGAD00001002317	Blood	SRR5833200	ENCSR988JLN	Heart
ERR1232281	EGAD00001002317	Blood	SRR5833201	ENCSR988JLN	Heart
ERR466052	EGAD00001002317	Blood	SRR20463616	ENCSR066SQU	Heart
ERR466043	EGAD00001002317	Blood	SRR20463617	ENCSR066SQU	Heart
ERR589949	EGAD00001002317	Blood	SRR20463618	ENCSR066SQU	Heart
ERR327601	EGAD00001002317	Blood	SRR20463619	ENCSR066SQU	Heart
ERR466050	EGAD00001002317	Blood	SRR20463620	ENCSR066SQU	Heart
ERR466022	EGAD00001002317	Blood	SRR20463621	ENCSR066SQU	Heart
ERR466001	EGAD00001002317	Blood	SRR20463622	ENCSR066SQU	Heart
ERR364239	EGAD00001002317	Blood	SRR20463623	ENCSR066SQU	Heart
ERR738675	EGAD00001002317	Blood	SRR20463624	ENCSR066SQU	Heart
ERR1230229	EGAD00001002328	Blood	SRR20463625	ENCSR066SQU	Heart
ERR1230328	EGAD00001002328	Blood	SRR20463626	ENCSR066SQU	Heart
ERR1233559	EGAD00001002328	Blood	SRR20463627	ENCSR066SQU	Heart
ERR1230289	EGAD00001002328	Blood	SRR16812552	ENCSR696BIF	Heart
ERR1230345	EGAD00001002328	Blood	SRR16812553	ENCSR696BIF	Heart
ERR1230348	EGAD00001002328	Blood	SRR16812554	ENCSR696BIF	Heart
ERR1233558	EGAD00001002328	Blood	SRR16812555	ENCSR696BIF	Heart
ERR1230263	EGAD00001002328	Blood	SRR16812556	ENCSR696BIF	Heart
ERR1230330	EGAD00001002368	Blood	SRR16812557	ENCSR696BIF	Heart
ERR1230231	EGAD00001002368	Blood	SRR16812558	ENCSR696BIF	Heart
ERR1233563	EGAD00001002368	Blood	SRR16812559	ENCSR696BIF	Heart
ERR1230264	EGAD00001002368	Blood	SRR20473249	ENCSR427TBJ	Heart
ERR1230257	EGAD00001002368	Blood	SRR20473250	ENCSR427TBJ	Heart
ERR1230349	EGAD00001002368	Blood	SRR20473251	ENCSR427TBJ	Heart
ERR1230291	EGAD00001002368	Blood	SRR20473252	ENCSR427TBJ	Heart
ERR1233562	EGAD00001002368	Blood	SRR20473253	ENCSR427TBJ	Heart
ERR1230351	EGAD00001002408	Blood	SRR20473254	ENCSR427TBJ	Heart
ERR1230340	EGAD00001002408	Blood	SRR20473255	ENCSR427TBJ	Heart
ERR1230342	EGAD00001002408	Blood	SRR20473256	ENCSR427TBJ	Heart
ERR1233531	EGAD00001002408	Blood	SRR13804142	ENCSR371UJJ	Heart
ERR1230294	EGAD00001002408	Blood	SRR13804143	ENCSR371UJJ	Heart
ERR1233530	EGAD00001002408	Blood	SRR13804144	ENCSR371UJJ	Heart
ERR1230293	EGAD00001002408	Blood	SRR13804145	ENCSR371UJJ	Heart
ERR1230336	EGAD00001002408	Blood	SRR13804146	ENCSR371UJJ	Heart
ERR1230270	EGAD00001002413	Blood	SRR13804147	ENCSR371UJJ	Heart
ERR1230354	EGAD00001002413	Blood	SRR13804148	ENCSR371UJJ	Heart
ERR1230268	EGAD00001002413	Blood	SRR13804149	ENCSR371UJJ	Heart
ERR1233533	EGAD00001002413	Blood	SRR13804443	ENCSR596TFH	Heart
ERR1233532	EGAD00001002413	Blood	SRR13804444	ENCSR596TFH	Heart
ERR1230269	EGAD00001002413	Blood	SRR13804445	ENCSR596TFH	Heart
ERR1230315	EGAD00001002413	Blood	SRR13804446	ENCSR596TFH	Heart
ERR1232297	EGAD00001002413	Blood	SRR13804447	ENCSR596TFH	Heart
ERR1230316	EGAD00001002413	Blood	SRR13804448	ENCSR596TFH	Heart
ERR1232296	EGAD00001002413	Blood	SRR13804449	ENCSR596TFH	Heart
ERR1230312	EGAD00001002415	Blood	SRR13804450	ENCSR596TFH	Heart
ERR1230260	EGAD00001002415	Blood	SRR10049642	ENCSR799KLF	Heart
ERR1233556	EGAD00001002415	Blood	SRR10049643	ENCSR799KLF	Heart
ERR1230314	EGAD00001002415	Blood	SRR10049644	ENCSR799KLF	Heart
ERR1233557	EGAD00001002415	Blood	SRR10049645	ENCSR799KLF	Heart
ERR1230266	EGAD00001002415	Blood	SRR10388719	ENCSR361XMB	Heart
ERR1230254	EGAD00001002415	Blood	SRR10388720	ENCSR361XMB	Heart
ERR1230267	EGAD00001002415	Blood	SRR10388721	ENCSR361XMB	Heart
ERR928108	EGAD00001002430	Blood	SRR10388722	ENCSR361XMB	Heart
ERR1043022	EGAD00001002430	Blood	SRR10388723	ENCSR361XMB	Heart
ERR1042931	EGAD00001002430	Blood	SRR10388724	ENCSR361XMB	Heart
ERR928107	EGAD00001002430	Blood	SRR10388725	ENCSR361XMB	Heart
ERR1042958	EGAD00001002430	Blood	SRR10388726	ENCSR361XMB	Heart
ERR861467	EGAD00001002430	Blood	SRR10388727	ENCSR361XMB	Heart
ERR928110	EGAD00001002430	Blood	SRR10388728	ENCSR361XMB	Heart
ERR1043016	EGAD00001002430	Blood	SRR5338788	ENCSR500ZGF	Heart
ERR1043021	EGAD00001002430	Blood	SRR5338789	ENCSR500ZGF	Heart
ERR1043044	EGAD00001002430	Blood	SRR5338790	ENCSR500ZGF	Heart
ERR1042968	EGAD00001002430	Blood	SRR5338791	ENCSR500ZGF	Heart
ERR928109	EGAD00001002430	Blood	SRR5338792	ENCSR500ZGF	Heart
ERR1042957	EGAD00001002430	Blood	SRR5338793	ENCSR500ZGF	Heart
ERR928133	EGAD00001002430	Blood	SRR5833172	ENCSR967KZJ	Heart
ERR1043046	EGAD00001002430	Blood	SRR5833173	ENCSR967KZJ	Heart
ERR928106	EGAD00001002430	Blood	SRR5833174	ENCSR967KZJ	Heart
ERR1042956	EGAD00001002430	Blood	SRR20468367	ENCSR958QNE	Heart
ERR861468	EGAD00001002430	Blood	SRR20468369	ENCSR958QNE	Heart
ERR1043025	EGAD00001002430	Blood	SRR20468371	ENCSR958QNE	Heart
ERR1043024	EGAD00001002430	Blood	SRR20468373	ENCSR958QNE	Heart
ERR928134	EGAD00001002430	Blood	SRR20468375	ENCSR958QNE	Heart
ERR738696	EGAD00001002439	Blood	SRR20468377	ENCSR958QNE	Heart
ERR738687	EGAD00001002439	Blood	SRR20468379	ENCSR958QNE	Heart
ERR738667	EGAD00001002439	Blood	SRR20468381	ENCSR958QNE	Heart
ERR592881	EGAD00001002439	Blood	SRR16811520	ENCSR670UJZ	Heart
ERR589942	EGAD00001002439	Blood	SRR16811521	ENCSR670UJZ	Heart
ERR738685	EGAD00001002439	Blood	SRR16811522	ENCSR670UJZ	Heart
ERR592880	EGAD00001002439	Blood	SRR16813935	ENCSR724MJX	Heart
ERR1419015	EGAD00001002439	Blood	SRR16813936	ENCSR724MJX	Heart
ERR466053	EGAD00001002439	Blood	SRR16813937	ENCSR724MJX	Heart
ERR592882	EGAD00001002439	Blood	SRR16813938	ENCSR724MJX	Heart
ERR364243	EGAD00001002439	Blood	SRR16813939	ENCSR724MJX	Heart
ERR589963	EGAD00001002444	Blood	SRR16813940	ENCSR724MJX	Heart
ERR738681	EGAD00001002444	Blood	SRR16813941	ENCSR724MJX	Heart
ERR266319	EGAD00001002444	Blood	SRR16813942	ENCSR724MJX	Heart
ERR327589	EGAD00001002444	Blood	SRR13803839	ENCSR496TBI	Heart
ERR589997	EGAD00001002444	Blood	SRR13803840	ENCSR496TBI	Heart
ERR222525	EGAD00001002444	Blood	SRR13803841	ENCSR496TBI	Heart
ERR466058	EGAD00001002444	Blood	SRR13803842	ENCSR496TBI	Heart
ERR364252	EGAD00001002444	Blood	SRR13803843	ENCSR496TBI	Heart
ERR364289	EGAD00001002444	Blood	SRR13803844	ENCSR496TBI	Heart
ERR327572	EGAD00001002444	Blood	SRR13803845	ENCSR496TBI	Heart
ERR222499	EGAD00001002444	Blood	SRR13803846	ENCSR496TBI	Heart
ERR364280	EGAD00001002444	Blood	SRR13804313	ENCSR848BXL	Heart
ERR589967	EGAD00001002444	Blood	SRR13804314	ENCSR848BXL	Heart
ERR589998	EGAD00001002444	Blood	SRR13804315	ENCSR848BXL	Heart
ERR466026	EGAD00001002444	Blood	SRR13804316	ENCSR848BXL	Heart
ERR364272	EGAD00001002444	Blood	SRR13804317	ENCSR848BXL	Heart
ERR364290	EGAD00001002444	Blood	SRR13804318	ENCSR848BXL	Heart
ERR222560	EGAD00001002444	Blood	SRR13804319	ENCSR848BXL	Heart
ERR364281	EGAD00001002444	Blood	SRR13804320	ENCSR848BXL	Heart
ERR248904	EGAD00001002444	Blood	SRR10388743	ENCSR817FGU	Heart
ERR465971	EGAD00001002444	Blood	SRR10388744	ENCSR817FGU	Heart
ERR738665	EGAD00001002444	Blood	SRR10388745	ENCSR817FGU	Heart
ERR222505	EGAD00001002444	Blood	SRR10388746	ENCSR817FGU	Heart
ERR327629	EGAD00001002444	Blood	SRR10388747	ENCSR817FGU	Heart
ERR248905	EGAD00001002444	Blood	SRR10388748	ENCSR817FGU	Heart
ERR222536	EGAD00001002444	Blood	SRR10388749	ENCSR817FGU	Heart
ERR364292	EGAD00001002444	Blood	SRR10388750	ENCSR817FGU	Heart
ERR589956	EGAD00001002444	Blood	SRR10837898	ENCSR449FRQ	Heart
ERR222552	EGAD00001002444	Blood	SRR10837899	ENCSR449FRQ	Heart
ERR248903	EGAD00001002444	Blood	SRR10837900	ENCSR449FRQ	Heart
ERR222501	EGAD00001002444	Blood	SRR10837901	ENCSR449FRQ	Heart
ERR266323	EGAD00001002444	Blood	SRR5832790	ENCSR438QZN	Heart
ERR738688	EGAD00001002444	Blood	SRR5832791	ENCSR438QZN	Heart
ERR222523	EGAD00001002444	Blood	SRR5832792	ENCSR438QZN	Heart
ERR364265	EGAD00001002444	Blood	SRR5832793	ENCSR438QZN	Heart
ERR466041	EGAD00001002444	Blood	SRR6213573	ENCSR368ORV	Heart
ERR327573	EGAD00001002444	Blood	SRR6213574	ENCSR368ORV	Heart
ERR364235	EGAD00001002444	Blood	SRR16811303	ENCSR412THE	Heart
ERR222558	EGAD00001002444	Blood	SRR16811304	ENCSR412THE	Heart
ERR589960	EGAD00001002444	Blood	SRR16811305	ENCSR412THE	Heart
ERR222524	EGAD00001002444	Blood	SRR16811306	ENCSR412THE	Heart
ERR731958	EGAD00001002444	Blood	SRR16811307	ENCSR412THE	Heart
ERR731958	EGAD00001002444	Blood	SRR16811308	ENCSR412THE	Heart
ERR364274	EGAD00001002444	Blood	SRR16811309	ENCSR412THE	Heart
ERR222561	EGAD00001002444	Blood	SRR16811310	ENCSR412THE	Heart
ERR738676	EGAD00001002444	Blood	SRR16807962	ENCSR135GZX	Heart
ERR648131	EGAD00001002444	Blood	SRR16807963	ENCSR135GZX	Heart
ERR266320	EGAD00001002444	Blood	SRR16807964	ENCSR135GZX	Heart
ERR364291	EGAD00001002444	Blood	SRR16807965	ENCSR135GZX	Heart
ERR364242	EGAD00001002444	Blood	SRR16807966	ENCSR135GZX	Heart
ERR738683	EGAD00001002444	Blood	SRR16807967	ENCSR135GZX	Heart
ERR327574	EGAD00001002444	Blood	SRR16807968	ENCSR135GZX	Heart
ERR589955	EGAD00001002444	Blood	SRR16807969	ENCSR135GZX	Heart
ERR222504	EGAD00001002444	Blood	SRR16808909	ENCSR178KWE	Heart
ERR466059	EGAD00001002444	Blood	SRR16808910	ENCSR178KWE	Heart
ERR364261	EGAD00001002444	Blood	SRR16808911	ENCSR178KWE	Heart
ERR327568	EGAD00001002444	Blood	SRR16808912	ENCSR178KWE	Heart
ERR364279	EGAD00001002444	Blood	SRR16808913	ENCSR178KWE	Heart
ERR364266	EGAD00001002444	Blood	SRR16808914	ENCSR178KWE	Heart
ERR327608	EGAD00001002444	Blood	SRR16808915	ENCSR178KWE	Heart
ERR222559	EGAD00001002444	Blood	SRR16808916	ENCSR178KWE	Heart
ERR222500	EGAD00001002444	Blood	SRR13804485	ENCSR900SJW	Heart
ERR648130	EGAD00001002444	Blood	SRR13804486	ENCSR900SJW	Heart
ERR266314	EGAD00001002444	Blood	SRR13804487	ENCSR900SJW	Heart
ERR266327	EGAD00001002444	Blood	SRR13804488	ENCSR900SJW	Heart
ERR222506	EGAD00001002444	Blood	SRR13804489	ENCSR900SJW	Heart
ERR222510	EGAD00001002444	Blood	SRR13804490	ENCSR900SJW	Heart
ERR364251	EGAD00001002444	Blood	SRR13804491	ENCSR900SJW	Heart
ERR222502	EGAD00001002444	Blood	SRR13804492	ENCSR900SJW	Heart
ERR589973	EGAD00001002449	Blood	SRR13804564	ENCSR912VCU	Heart
ERR833702	EGAD00001002449	Blood	SRR13804565	ENCSR912VCU	Heart
ERR248917	EGAD00001002449	Blood	SRR13804566	ENCSR912VCU	Heart
ERR710314	EGAD00001002449	Blood	SRR13804567	ENCSR912VCU	Heart
ERR179453	EGAD00001002449	Blood	SRR13804568	ENCSR912VCU	Heart
ERR179452	EGAD00001002449	Blood	SRR13804569	ENCSR912VCU	Heart
ERR179436	EGAD00001002449	Blood	SRR13804570	ENCSR912VCU	Heart
ERR589971	EGAD00001002449	Blood	SRR13804571	ENCSR912VCU	Heart
ERR179435	EGAD00001002449	Blood	SRR10049512	ENCSR181ATL	Heart
ERR222533	EGAD00001002449	Blood	SRR10049513	ENCSR181ATL	Heart
ERR841663	EGAD00001002449	Blood	SRR10049514	ENCSR181ATL	Heart
ERR589924	EGAD00001002449	Blood	SRR10049515	ENCSR181ATL	Heart
ERR327628	EGAD00001002449	Blood	SRR10388930	ENCSR954TSY	Heart
ERR179439	EGAD00001002449	Blood	SRR10388931	ENCSR954TSY	Heart
ERR232476	EGAD00001002449	Blood	SRR10388932	ENCSR954TSY	Heart
ERR710288	EGAD00001002449	Blood	SRR10388933	ENCSR954TSY	Heart
ERR710336	EGAD00001002449	Blood	SRR10388934	ENCSR954TSY	Heart
ERR589974	EGAD00001002449	Blood	SRR10388935	ENCSR954TSY	Heart
ERR589972	EGAD00001002449	Blood	SRR10388936	ENCSR954TSY	Heart
ERR179456	EGAD00001002449	Blood	SRR10388937	ENCSR954TSY	Heart
ERR179449	EGAD00001002449	Blood	SRR10388938	ENCSR954TSY	Heart
ERR202372	EGAD00001002449	Blood	SRR10388939	ENCSR954TSY	Heart
ERR232478	EGAD00001002449	Blood	SRR10388940	ENCSR954TSY	Heart
ERR222516	EGAD00001002449	Blood	SRR10388941	ENCSR954TSY	Heart
ERR833701	EGAD00001002449	Blood	SRR5338671	ENCSR343ZOV	Heart
ERR222556	EGAD00001002449	Blood	SRR5338672	ENCSR343ZOV	Heart
ERR710332	EGAD00001002449	Blood	SRR5338673	ENCSR343ZOV	Heart
ERR179450	EGAD00001002449	Blood	SRR5338674	ENCSR343ZOV	Heart
ERR589936	EGAD00001002449	Blood	SRR5338675	ENCSR343ZOV	Heart
ERR179428	EGAD00001002449	Blood	SRR5338677	ENCSR343ZOV	Heart
ERR710343	EGAD00001002449	Blood	SRR5833014	ENCSR791KFQ	Heart
ERR589937	EGAD00001002449	Blood	SRR5833015	ENCSR791KFQ	Heart
ERR179427	EGAD00001002449	Blood	SRR5833113	ENCSR901SIL	Heart
ERR232485	EGAD00001002449	Blood	SRR5833114	ENCSR901SIL	Heart
ERR179455	EGAD00001002449	Blood	SRR5833115	ENCSR901SIL	Heart
ERR179451	EGAD00001002449	Blood	SRR5833116	ENCSR901SIL	Heart
ERR232467	EGAD00001002449	Blood	SRR20464007	ENCSR300WWL	Heart
ERR589975	EGAD00001002449	Blood	SRR20464008	ENCSR300WWL	Heart
ERR833701	EGAD00001002449	Blood	SRR20464009	ENCSR300WWL	Heart
ERR202367	EGAD00001002449	Blood	SRR20464010	ENCSR300WWL	Heart
ERR202377	EGAD00001002449	Blood	SRR20464011	ENCSR300WWL	Heart
ERR731957	EGAD00001002449	Blood	SRR20464012	ENCSR300WWL	Heart
ERR179460	EGAD00001002449	Blood	SRR20464013	ENCSR300WWL	Heart
ERR179426	EGAD00001002449	Blood	SRR20464014	ENCSR300WWL	Heart
ERR232483	EGAD00001002449	Blood	SRR16809762	ENCSR370LLS	Heart
ERR179429	EGAD00001002449	Blood	SRR16809763	ENCSR370LLS	Heart
ERR202362	EGAD00001002449	Blood	SRR16809764	ENCSR370LLS	Heart
ERR232484	EGAD00001002449	Blood	SRR16809765	ENCSR370LLS	Heart
ERR179432	EGAD00001002449	Blood	SRR16809766	ENCSR370LLS	Heart
ERR202370	EGAD00001002449	Blood	SRR16809767	ENCSR370LLS	Heart
ERR179443	EGAD00001002449	Blood	SRR16809768	ENCSR370LLS	Heart
ERR179442	EGAD00001002449	Blood	SRR16809769	ENCSR370LLS	Heart
ERR202365	EGAD00001002449	Blood	SRR16811925	ENCSR428WBJ	Heart
ERR179458	EGAD00001002449	Blood	SRR16811926	ENCSR428WBJ	Heart
ERR179441	EGAD00001002449	Blood	SRR16811927	ENCSR428WBJ	Heart
ERR202363	EGAD00001002449	Blood	SRR16811928	ENCSR428WBJ	Heart
ERR179445	EGAD00001002449	Blood	SRR16811929	ENCSR428WBJ	Heart
ERR710347	EGAD00001002449	Blood	SRR16811930	ENCSR428WBJ	Heart
ERR731957	EGAD00001002449	Blood	SRR16811931	ENCSR428WBJ	Heart
ERR710313	EGAD00001002449	Blood	SRR16811932	ENCSR428WBJ	Heart
ERR710346	EGAD00001002449	Blood	SRR16811933	ENCSR428WBJ	Heart
ERR710328	EGAD00001002449	Blood	SRR16811934	ENCSR428WBJ	Heart
ERR179457	EGAD00001002449	Blood	SRR16811935	ENCSR428WBJ	Heart
ERR179434	EGAD00001002449	Blood	SRR16811936	ENCSR428WBJ	Heart
ERR232480	EGAD00001002449	Blood	SRR13803972	ENCSR783LKF	Heart
ERR202366	EGAD00001002449	Blood	SRR13803973	ENCSR783LKF	Heart
ERR257694	EGAD00001002449	Blood	SRR13803979	ENCSR783LKF	Heart
ERR841648	EGAD00001002449	Blood	SRR13804588	ENCSR433LHD	Heart
ERR841662	EGAD00001002449	Blood	SRR13804589	ENCSR433LHD	Heart
ERR179433	EGAD00001002449	Blood	SRR13804590	ENCSR433LHD	Heart
ERR179448	EGAD00001002449	Blood	SRR13804591	ENCSR433LHD	Heart
ERR179431	EGAD00001002449	Blood	SRR13804592	ENCSR433LHD	Heart
ERR710345	EGAD00001002449	Blood	SRR13804593	ENCSR433LHD	Heart
ERR222531	EGAD00001002449	Blood	SRR13804594	ENCSR433LHD	Heart
ERR327643	EGAD00001002449	Blood	SRR13804595	ENCSR433LHD	Heart
ERR202374	EGAD00001002449	Blood	SRR10049650	ENCSR803MVC	Heart
ERR710341	EGAD00001002449	Blood	SRR10049651	ENCSR803MVC	Heart
ERR710331	EGAD00001002449	Blood	SRR10049652	ENCSR803MVC	Heart
ERR232474	EGAD00001002449	Blood	SRR10049653	ENCSR803MVC	Heart
ERR179454	EGAD00001002449	Blood	SRR10388773	ENCSR392WQN	Heart
ERR222517	EGAD00001002449	Blood	SRR10388774	ENCSR392WQN	Heart
ERR589970	EGAD00001002449	Blood	SRR10388775	ENCSR392WQN	Heart
ERR232481	EGAD00001002449	Blood	SRR10388776	ENCSR392WQN	Heart
ERR202376	EGAD00001002449	Blood	SRR10837658	ENCSR250AAV	Heart
ERR222498	EGAD00001002449	Blood	SRR10837659	ENCSR250AAV	Heart
ERR202373	EGAD00001002449	Blood	SRR10837660	ENCSR250AAV	Heart
ERR179438	EGAD00001002449	Blood	SRR10837661	ENCSR250AAV	Heart
ERR710287	EGAD00001002449	Blood	SRR10837662	ENCSR250AAV	Heart
ERR833702	EGAD00001002449	Blood	SRR10837663	ENCSR250AAV	Heart
ERR710283	EGAD00001002449	Blood	SRR10837664	ENCSR250AAV	Heart
ERR232477	EGAD00001002449	Blood	SRR10837665	ENCSR250AAV	Heart
ERR179425	EGAD00001002449	Blood	SRR5832950	ENCSR000XAA	Heart
ERR179444	EGAD00001002449	Blood	SRR5832951	ENCSR000XAA	Heart
ERR589938	EGAD00001002449	Blood	SRR5832952	ENCSR000XAA	Heart
ERR222530	EGAD00001002449	Blood	SRR5832953	ENCSR000XAA	Heart
ERR710322	EGAD00001002449	Blood	SRR16808694	ENCSR048OAV	Heart
ERR179446	EGAD00001002449	Blood	SRR16808695	ENCSR048OAV	Heart
ERR710303	EGAD00001002449	Blood	SRR16808696	ENCSR048OAV	Heart
ERR179447	EGAD00001002449	Blood	SRR16808697	ENCSR048OAV	Heart
ERR232475	EGAD00001002449	Blood	SRR16808698	ENCSR048OAV	Heart
ERR841661	EGAD00001002449	Blood	SRR16808699	ENCSR048OAV	Heart
ERR589926	EGAD00001002449	Blood	SRR16808700	ENCSR048OAV	Heart
ERR232479	EGAD00001002449	Blood	SRR16808701	ENCSR048OAV	Heart
ERR710327	EGAD00001002449	Blood	SRR16807112	ENCSR001UVQ	Intestine
ERR710324	EGAD00001002449	Blood	SRR16807113	ENCSR001UVQ	Intestine
ERR222532	EGAD00001002449	Blood	SRR16807114	ENCSR001UVQ	Intestine
ERR589925	EGAD00001002449	Blood	SRR16807115	ENCSR001UVQ	Intestine
ERR710325	EGAD00001002449	Blood	SRR16807116	ENCSR001UVQ	Intestine
ERR364283	EGAD00001002450	Blood	SRR16807117	ENCSR001UVQ	Intestine
ERR465993	EGAD00001002450	Blood	SRR16807118	ENCSR001UVQ	Intestine
ERR1419016	EGAD00001002450	Blood	SRR16807119	ENCSR001UVQ	Intestine
ERR1419017	EGAD00001002450	Blood	SRR5833016	ENCSR005UXZ	Intestine
ERR1230322	EGAD00001002453	Blood	SRR5833017	ENCSR005UXZ	Intestine
ERR1230323	EGAD00001002453	Blood	SRR10388411	ENCSR043RXI	Intestine
ERR1230321	EGAD00001002453	Blood	SRR10388412	ENCSR043RXI	Intestine
ERR1230261	EGAD00001002453	Blood	SRR10388413	ENCSR043RXI	Intestine
ERR1042954	EGAD00001002455	Blood	SRR10388414	ENCSR043RXI	Intestine
ERR248916	EGAD00001002455	Blood	SRR10837389	ENCSR047JMV	Intestine
ERR1042933	EGAD00001002455	Blood	SRR10837391	ENCSR047JMV	Intestine
ERR466060	EGAD00001002455	Blood	SRR10837392	ENCSR047JMV	Intestine
ERR1042955	EGAD00001002455	Blood	SRR10837393	ENCSR047JMV	Intestine
ERR248902	EGAD00001002455	Blood	SRR10837394	ENCSR047JMV	Intestine
ERR248907	EGAD00001002455	Blood	SRR10837395	ENCSR047JMV	Intestine
ERR266317	EGAD00001002455	Blood	SRR10837396	ENCSR047JMV	Intestine
ERR1043091	EGAD00001002455	Blood	SRR10837397	ENCSR047JMV	Intestine
ERR1042988	EGAD00001002455	Blood	SRR10837398	ENCSR047JMV	Intestine
ERR364268	EGAD00001002455	Blood	SRR10388416	ENCSR063BPD	Intestine
ERR266328	EGAD00001002455	Blood	SRR10388417	ENCSR063BPD	Intestine
ERR364254	EGAD00001002455	Blood	SRR10388418	ENCSR063BPD	Intestine
ERR465997	EGAD00001002455	Blood	SRR10388419	ENCSR063BPD	Intestine
ERR266321	EGAD00001002455	Blood	SRR14636830	ENCSR067VEM	Intestine
ERR364253	EGAD00001002455	Blood	SRR14636831	ENCSR067VEM	Intestine
ERR266315	EGAD00001002455	Blood	SRR14636832	ENCSR067VEM	Intestine
ERR1042986	EGAD00001002455	Blood	SRR14636833	ENCSR067VEM	Intestine
ERR222546	EGAD00001002455	Blood	SRR14636834	ENCSR067VEM	Intestine
ERR466009	EGAD00001002455	Blood	SRR14636835	ENCSR067VEM	Intestine
ERR589962	EGAD00001002455	Blood	SRR14636836	ENCSR067VEM	Intestine
ERR466008	EGAD00001002455	Blood	SRR14636837	ENCSR067VEM	Intestine
ERR589961	EGAD00001002455	Blood	SRR10837429	ENCSR069EGE	Intestine
ERR327630	EGAD00001002455	Blood	SRR10837430	ENCSR069EGE	Intestine
ERR1043028	EGAD00001002455	Blood	SRR10837431	ENCSR069EGE	Intestine
ERR266325	EGAD00001002455	Blood	SRR10837432	ENCSR069EGE	Intestine
ERR1042930	EGAD00001002455	Blood	SRR10837433	ENCSR069EGE	Intestine
ERR266324	EGAD00001002455	Blood	SRR10837434	ENCSR069EGE	Intestine
ERR222535	EGAD00001002455	Blood	SRR10837435	ENCSR069EGE	Intestine
ERR222521	EGAD00001002455	Blood	SRR10837436	ENCSR069EGE	Intestine
ERR222522	EGAD00001002455	Blood	SRR10837437	ENCSR069EGE	Intestine
ERR266316	EGAD00001002455	Blood	SRR10837438	ENCSR069EGE	Intestine
ERR466012	EGAD00001002455	Blood	SRR16809626	ENCSR078LIZ	Intestine
ERR248906	EGAD00001002455	Blood	SRR16809627	ENCSR078LIZ	Intestine
ERR465998	EGAD00001002455	Blood	SRR16809628	ENCSR078LIZ	Intestine
ERR1273881	EGAD00001002455	Blood	SRR16809629	ENCSR078LIZ	Intestine
ERR1042959	EGAD00001002455	Blood	SRR16809630	ENCSR078LIZ	Intestine
ERR222534	EGAD00001002455	Blood	SRR16809631	ENCSR078LIZ	Intestine
ERR589244	EGAD00001002458	Blood	SRR16809632	ENCSR078LIZ	Intestine
ERR589233	EGAD00001002458	Blood	SRR16809633	ENCSR078LIZ	Intestine
ERR589242	EGAD00001002458	Blood	SRR10837446	ENCSR083DXD	Intestine
ERR589235	EGAD00001002458	Blood	SRR10837447	ENCSR083DXD	Intestine
ERR589243	EGAD00001002458	Blood	SRR10837448	ENCSR083DXD	Intestine
ERR589234	EGAD00001002458	Blood	SRR10837449	ENCSR083DXD	Intestine
ERR466025	EGAD00001002463	Blood	SRR10837450	ENCSR083DXD	Intestine
ERR466021	EGAD00001002463	Blood	SRR10837451	ENCSR083DXD	Intestine
ERR327641	EGAD00001002463	Blood	SRR10837452	ENCSR083DXD	Intestine
ERR738670	EGAD00001002463	Blood	SRR10837453	ENCSR083DXD	Intestine
ERR466023	EGAD00001002463	Blood	SRR10837454	ENCSR083DXD	Intestine
ERR364259	EGAD00001002463	Blood	SRR10837455	ENCSR083DXD	Intestine
ERR592885	EGAD00001002463	Blood	SRR10837456	ENCSR083DXD	Intestine
ERR222503	EGAD00001002463	Blood	SRR10837457	ENCSR083DXD	Intestine
ERR364260	EGAD00001002463	Blood	SRR10837458	ENCSR083DXD	Intestine
ERR1043116	EGAD00001002463	Blood	SRR10837459	ENCSR083DXD	Intestine
ERR364244	EGAD00001002463	Blood	SRR10837473	ENCSR101EEJ	Intestine
ERR222520	EGAD00001002463	Blood	SRR10837474	ENCSR101EEJ	Intestine
ERR1043029	EGAD00001002463	Blood	SRR10837475	ENCSR101EEJ	Intestine
ERR222547	EGAD00001002463	Blood	SRR10837476	ENCSR101EEJ	Intestine
ERR1043118	EGAD00001002463	Blood	SRR10837477	ENCSR101EEJ	Intestine
ERR863634	EGAD00001002463	Blood	SRR10837478	ENCSR101EEJ	Intestine
ERR222553	EGAD00001002463	Blood	SRR10837479	ENCSR101EEJ	Intestine
ERR364245	EGAD00001002463	Blood	SRR10837480	ENCSR101EEJ	Intestine
ERR466024	EGAD00001002463	Blood	SRR10837485	ENCSR104CCB	Intestine
ERR465990	EGAD00001002463	Blood	SRR10837486	ENCSR104CCB	Intestine
ERR466068	EGAD00001002463	Blood	SRR10837487	ENCSR104CCB	Intestine
ERR466016	EGAD00001002463	Blood	SRR10837488	ENCSR104CCB	Intestine
ERR222548	EGAD00001002463	Blood	SRR5832699	ENCSR150YAU	Intestine
ERR364275	EGAD00001002463	Blood	SRR5832700	ENCSR150YAU	Intestine
ERR1043115	EGAD00001002463	Blood	SRR5832701	ENCSR150YAU	Intestine
ERR863608	EGAD00001002463	Blood	SRR5832702	ENCSR150YAU	Intestine
ERR364248	EGAD00001002463	Blood	SRR10837555	ENCSR172LVU	Intestine
ERR1043117	EGAD00001002463	Blood	SRR10837556	ENCSR172LVU	Intestine
ERR1043119	EGAD00001002463	Blood	SRR10837557	ENCSR172LVU	Intestine
ERR364278	EGAD00001002463	Blood	SRR10837558	ENCSR172LVU	Intestine
ERR1042980	EGAD00001002463	Blood	SRR10388584	ENCSR181HTE	Intestine
ERR327602	EGAD00001002463	Blood	SRR10388585	ENCSR181HTE	Intestine
ERR1042928	EGAD00001002463	Blood	SRR10388586	ENCSR181HTE	Intestine
ERR738671	EGAD00001002463	Blood	SRR10388587	ENCSR181HTE	Intestine
ERR769360	EGAD00001002466	Blood	SRR5832686	ENCSR208QRN	Intestine
ERR861013	EGAD00001002466	Blood	SRR5832687	ENCSR208QRN	Intestine
ERR861013	EGAD00001002466	Blood	SRR14637727	ENCSR249IKQ	Intestine
ERR928131	EGAD00001002466	Blood	SRR14637728	ENCSR249IKQ	Intestine
ERR1043131	EGAD00001002466	Blood	SRR14637729	ENCSR249IKQ	Intestine
ERR928161	EGAD00001002466	Blood	SRR14637730	ENCSR249IKQ	Intestine
ERR769483	EGAD00001002466	Blood	SRR5832778	ENCSR268ZCF	Intestine
ERR928145	EGAD00001002466	Blood	SRR5832779	ENCSR268ZCF	Intestine
ERR1043043	EGAD00001002466	Blood	SRR10837690	ENCSR277SUG	Intestine
ERR1043003	EGAD00001002466	Blood	SRR10837691	ENCSR277SUG	Intestine
ERR928132	EGAD00001002466	Blood	SRR10837692	ENCSR277SUG	Intestine
ERR769467	EGAD00001002466	Blood	SRR10837693	ENCSR277SUG	Intestine
ERR1043012	EGAD00001002466	Blood	SRR16811285	ENCSR313DUH	Intestine
ERR769436	EGAD00001002466	Blood	SRR16811286	ENCSR313DUH	Intestine
ERR769462	EGAD00001002466	Blood	SRR16811287	ENCSR313DUH	Intestine
ERR769451	EGAD00001002466	Blood	SRR16811288	ENCSR313DUH	Intestine
ERR928206	EGAD00001002466	Blood	SRR16811289	ENCSR313DUH	Intestine
ERR769438	EGAD00001002466	Blood	SRR16811290	ENCSR313DUH	Intestine
ERR1043004	EGAD00001002466	Blood	SRR16811291	ENCSR313DUH	Intestine
ERR769362	EGAD00001002466	Blood	SRR16811292	ENCSR313DUH	Intestine
ERR928104	EGAD00001002466	Blood	SRR10837717	ENCSR315EZG	Intestine
ERR928164	EGAD00001002466	Blood	SRR10837718	ENCSR315EZG	Intestine
ERR769437	EGAD00001002466	Blood	SRR10837719	ENCSR315EZG	Intestine
ERR769452	EGAD00001002466	Blood	SRR10837720	ENCSR315EZG	Intestine
ERR769361	EGAD00001002466	Blood	SRR10837725	ENCSR315EZG	Intestine
ERR1043005	EGAD00001002466	Blood	SRR10837726	ENCSR315EZG	Intestine
ERR1042978	EGAD00001002466	Blood	SRR10837727	ENCSR315EZG	Intestine
ERR769469	EGAD00001002466	Blood	SRR10837728	ENCSR315EZG	Intestine
ERR769425	EGAD00001002466	Blood	SRR10837755	ENCSR333HMT	Intestine
ERR769433	EGAD00001002466	Blood	SRR10837756	ENCSR333HMT	Intestine
ERR1043129	EGAD00001002466	Blood	SRR10837757	ENCSR333HMT	Intestine
ERR769470	EGAD00001002466	Blood	SRR10837758	ENCSR333HMT	Intestine
ERR928219	EGAD00001002466	Blood	SRR10837759	ENCSR333HMT	Intestine
ERR861543	EGAD00001002466	Blood	SRR10837760	ENCSR333HMT	Intestine
ERR863606	EGAD00001002466	Blood	SRR16808901	ENCSR340ARM	Intestine
ERR769423	EGAD00001002466	Blood	SRR16808902	ENCSR340ARM	Intestine
ERR1043128	EGAD00001002466	Blood	SRR16808903	ENCSR340ARM	Intestine
ERR1042953	EGAD00001002466	Blood	SRR16808904	ENCSR340ARM	Intestine
ERR769439	EGAD00001002466	Blood	SRR16808905	ENCSR340ARM	Intestine
ERR928103	EGAD00001002466	Blood	SRR16808906	ENCSR340ARM	Intestine
ERR769461	EGAD00001002466	Blood	SRR16808907	ENCSR340ARM	Intestine
ERR769424	EGAD00001002466	Blood	SRR16808908	ENCSR340ARM	Intestine
ERR928205	EGAD00001002466	Blood	SRR10837796	ENCSR343NWC	Intestine
ERR928207	EGAD00001002466	Blood	SRR10837797	ENCSR343NWC	Intestine
ERR769468	EGAD00001002466	Blood	SRR10837798	ENCSR343NWC	Intestine
ERR769407	EGAD00001002466	Blood	SRR10837799	ENCSR343NWC	Intestine
ERR769405	EGAD00001002466	Blood	SRR10837800	ENCSR343NWC	Intestine
ERR769432	EGAD00001002466	Blood	SRR10837801	ENCSR343NWC	Intestine
ERR769463	EGAD00001002466	Blood	SRR10837802	ENCSR343NWC	Intestine
ERR928105	EGAD00001002466	Blood	SRR10388703	ENCSR349GPJ	Intestine
ERR1042979	EGAD00001002466	Blood	SRR10388704	ENCSR349GPJ	Intestine
ERR769466	EGAD00001002466	Blood	SRR10388705	ENCSR349GPJ	Intestine
ERR928162	EGAD00001002466	Blood	SRR10388706	ENCSR349GPJ	Intestine
ERR1043045	EGAD00001002466	Blood	SRR5833264	ENCSR363CJF	Intestine
ERR769488	EGAD00001002466	Blood	SRR5833265	ENCSR363CJF	Intestine
ERR863604	EGAD00001002466	Blood	SRR10837864	ENCSR413CHO	Intestine
ERR769408	EGAD00001002466	Blood	SRR10837865	ENCSR413CHO	Intestine
ERR769434	EGAD00001002466	Blood	SRR10837866	ENCSR413CHO	Intestine
ERR769359	EGAD00001002466	Blood	SRR10837867	ENCSR413CHO	Intestine
ERR769406	EGAD00001002466	Blood	SRR10837868	ENCSR413CHO	Intestine
ERR769347	EGAD00001002466	Blood	SRR10837869	ENCSR413CHO	Intestine
ERR1223395	EGAD00001002466	Blood	SRR10837871	ENCSR413CHO	Intestine
ERR769358	EGAD00001002466	Blood	SRR10837872	ENCSR413CHO	Intestine
ERR1043114	EGAD00001002466	Blood	SRR10837873	ENCSR413CHO	Intestine
ERR769435	EGAD00001002466	Blood	SRR10388836	ENCSR416ZMW	Intestine
ERR769464	EGAD00001002466	Blood	SRR10388837	ENCSR416ZMW	Intestine
ERR928163	EGAD00001002466	Blood	SRR10388838	ENCSR416ZMW	Intestine
ERR1043113	EGAD00001002466	Blood	SRR10388839	ENCSR416ZMW	Intestine
ERR1230350	EGAD00001002474	Blood	SRR10388870	ENCSR440PMP	Intestine
ERR1230331	EGAD00001002474	Blood	SRR10388871	ENCSR440PMP	Intestine
ERR1230333	EGAD00001002474	Blood	SRR10388872	ENCSR440PMP	Intestine
ERR1233564	EGAD00001002474	Blood	SRR10388873	ENCSR440PMP	Intestine
ERR1230258	EGAD00001002474	Blood	SRR13804746	ENCSR482OKN	Intestine
ERR1230332	EGAD00001002474	Blood	SRR13804747	ENCSR482OKN	Intestine
ERR1233565	EGAD00001002474	Blood	SRR13804748	ENCSR482OKN	Intestine
ERR216249	EGAD00001002484	Blood	SRR13804749	ENCSR482OKN	Intestine
ERR257693	EGAD00001002484	Blood	SRR13804750	ENCSR482OKN	Intestine
ERR222513	EGAD00001002484	Blood	SRR13804751	ENCSR482OKN	Intestine
ERR216253	EGAD00001002484	Blood	SRR13804752	ENCSR482OKN	Intestine
ERR222515	EGAD00001002484	Blood	SRR13804753	ENCSR482OKN	Intestine
ERR216245	EGAD00001002484	Blood	SRR13804754	ENCSR482OKN	Intestine
ERR222526	EGAD00001002484	Blood	SRR13804755	ENCSR482OKN	Intestine
ERR321933	EGAD00001002484	Blood	SRR13804756	ENCSR482OKN	Intestine
ERR248909	EGAD00001002484	Blood	SRR13804757	ENCSR482OKN	Intestine
ERR222555	EGAD00001002484	Blood	SRR13804758	ENCSR482OKN	Intestine
ERR202371	EGAD00001002484	Blood	SRR13804759	ENCSR482OKN	Intestine
ERR202368	EGAD00001002484	Blood	SRR10837937	ENCSR488YXS	Intestine
ERR216254	EGAD00001002484	Blood	SRR10837938	ENCSR488YXS	Intestine
ERR222541	EGAD00001002484	Blood	SRR10837939	ENCSR488YXS	Intestine
ERR202361	EGAD00001002484	Blood	SRR10837940	ENCSR488YXS	Intestine
ERR589984	EGAD00001002484	Blood	SRR10837941	ENCSR488YXS	Intestine
ERR222540	EGAD00001002484	Blood	SRR10837942	ENCSR488YXS	Intestine
ERR216252	EGAD00001002484	Blood	SRR10837943	ENCSR488YXS	Intestine
ERR589976	EGAD00001002484	Blood	SRR10837944	ENCSR488YXS	Intestine
ERR829411	EGAD00001002484	Blood	SRR10837945	ENCSR488YXS	Intestine
ERR861501	EGAD00001002484	Blood	SRR10837946	ENCSR488YXS	Intestine
ERR222511	EGAD00001002484	Blood	SRR13804795	ENCSR491FDG	Intestine
ERR222549	EGAD00001002484	Blood	SRR13804796	ENCSR491FDG	Intestine
ERR216259	EGAD00001002484	Blood	SRR13804797	ENCSR491FDG	Intestine
ERR216246	EGAD00001002484	Blood	SRR13804798	ENCSR491FDG	Intestine
ERR216247	EGAD00001002484	Blood	SRR13804799	ENCSR491FDG	Intestine
ERR222542	EGAD00001002484	Blood	SRR13804800	ENCSR491FDG	Intestine
ERR222551	EGAD00001002484	Blood	SRR16811428	ENCSR498LHL	Intestine
ERR222554	EGAD00001002484	Blood	SRR16811429	ENCSR498LHL	Intestine
ERR222543	EGAD00001002484	Blood	SRR16811430	ENCSR498LHL	Intestine
ERR216251	EGAD00001002484	Blood	SRR16811431	ENCSR498LHL	Intestine
ERR232482	EGAD00001002484	Blood	SRR16811432	ENCSR498LHL	Intestine
ERR222557	EGAD00001002484	Blood	SRR16811433	ENCSR498LHL	Intestine
ERR216256	EGAD00001002484	Blood	SRR16811434	ENCSR498LHL	Intestine
ERR232471	EGAD00001002484	Blood	SRR16811435	ENCSR498LHL	Intestine
ERR222514	EGAD00001002484	Blood	SRR10837961	ENCSR500QVK	Intestine
ERR222527	EGAD00001002484	Blood	SRR10837962	ENCSR500QVK	Intestine
ERR248911	EGAD00001002484	Blood	SRR10837963	ENCSR500QVK	Intestine
ERR232470	EGAD00001002484	Blood	SRR10837964	ENCSR500QVK	Intestine
ERR327640	EGAD00001002484	Blood	SRR10837965	ENCSR500QVK	Intestine
ERR222539	EGAD00001002484	Blood	SRR10837966	ENCSR500QVK	Intestine
ERR589986	EGAD00001002484	Blood	SRR10837967	ENCSR500QVK	Intestine
ERR232472	EGAD00001002484	Blood	SRR10837968	ENCSR500QVK	Intestine
ERR589977	EGAD00001002484	Blood	SRR10837969	ENCSR500QVK	Intestine
ERR589985	EGAD00001002484	Blood	SRR10837970	ENCSR500QVK	Intestine
ERR327565	EGAD00001002484	Blood	SRR10837993	ENCSR516QFO	Intestine
ERR589927	EGAD00001002484	Blood	SRR10837994	ENCSR516QFO	Intestine
ERR222550	EGAD00001002484	Blood	SRR10837995	ENCSR516QFO	Intestine
ERR589979	EGAD00001002484	Blood	SRR10837996	ENCSR516QFO	Intestine
ERR222545	EGAD00001002484	Blood	SRR10837997	ENCSR516QFO	Intestine
ERR248912	EGAD00001002484	Blood	SRR10837998	ENCSR516QFO	Intestine
ERR589939	EGAD00001002484	Blood	SRR10837999	ENCSR516QFO	Intestine
ERR216255	EGAD00001002484	Blood	SRR10838000	ENCSR516QFO	Intestine
ERR232469	EGAD00001002484	Blood	SRR10838001	ENCSR516QFO	Intestine
ERR222509	EGAD00001002484	Blood	SRR10838002	ENCSR516QFO	Intestine
ERR248908	EGAD00001002484	Blood	SRR10838003	ENCSR516QFO	Intestine
ERR222528	EGAD00001002484	Blood	SRR10838004	ENCSR516QFO	Intestine
ERR589981	EGAD00001002484	Blood	SRR10838005	ENCSR516QFO	Intestine
ERR216248	EGAD00001002484	Blood	SRR10838006	ENCSR516QFO	Intestine
ERR589982	EGAD00001002484	Blood	SRR16811706	ENCSR525HKY	Intestine
ERR222508	EGAD00001002484	Blood	SRR16811707	ENCSR525HKY	Intestine
ERR589978	EGAD00001002484	Blood	SRR16811708	ENCSR525HKY	Intestine
ERR216258	EGAD00001002484	Blood	SRR16811709	ENCSR525HKY	Intestine
ERR202360	EGAD00001002484	Blood	SRR16811710	ENCSR525HKY	Intestine
ERR222529	EGAD00001002484	Blood	SRR16811711	ENCSR525HKY	Intestine
ERR216250	EGAD00001002484	Blood	SRR16811712	ENCSR525HKY	Intestine
ERR248915	EGAD00001002484	Blood	SRR16811713	ENCSR525HKY	Intestine
ERR248910	EGAD00001002484	Blood	SRR10838027	ENCSR557OWY	Intestine
ERR222544	EGAD00001002484	Blood	SRR10838028	ENCSR557OWY	Intestine
ERR589980	EGAD00001002484	Blood	SRR10838029	ENCSR557OWY	Intestine
ERR258032	EGAD00001002484	Blood	SRR10838030	ENCSR557OWY	Intestine
ERR232473	EGAD00001002484	Blood	SRR16813513	ENCSR574USP	Intestine
ERR589983	EGAD00001002484	Blood	SRR16813514	ENCSR574USP	Intestine
ERR202369	EGAD00001002484	Blood	SRR16813515	ENCSR574USP	Intestine
ERR222538	EGAD00001002484	Blood	SRR16813516	ENCSR574USP	Intestine
ERR222512	EGAD00001002484	Blood	SRR16813517	ENCSR574USP	Intestine
ERR222518	EGAD00001002484	Blood	SRR16813518	ENCSR574USP	Intestine
ERR829414	EGAD00001002484	Blood	SRR16813519	ENCSR574USP	Intestine
ERR222519	EGAD00001002484	Blood	SRR16813520	ENCSR574USP	Intestine
ERR232468	EGAD00001002484	Blood	SRR16811590	ENCSR585FIP	Intestine
ERR589230	EGAD00001002491	Blood	SRR16811591	ENCSR585FIP	Intestine
ERR589252	EGAD00001002491	Blood	SRR16811592	ENCSR585FIP	Intestine
ERR590000	EGAD00001002491	Blood	SRR16811593	ENCSR585FIP	Intestine
ERR589253	EGAD00001002491	Blood	SRR16811594	ENCSR585FIP	Intestine
ERR589251	EGAD00001002491	Blood	SRR16811595	ENCSR585FIP	Intestine
ERR589232	EGAD00001002491	Blood	SRR16811596	ENCSR585FIP	Intestine
ERR589231	EGAD00001002491	Blood	SRR16811597	ENCSR585FIP	Intestine
ERR364282	EGAD00001002503	Blood	SRR13804622	ENCSR604QMH	Intestine
ERR1419018	EGAD00001002503	Blood	SRR13804623	ENCSR604QMH	Intestine
ERR466029	EGAD00001002503	Blood	SRR13804624	ENCSR604QMH	Intestine
ERR589992	EGAD00001002503	Blood	SRR13804625	ENCSR604QMH	Intestine
ERR589952	EGAD00001002503	Blood	SRR13804626	ENCSR604QMH	Intestine
ERR466030	EGAD00001002503	Blood	SRR13804627	ENCSR604QMH	Intestine
ERR648121	EGAD00001002504	Blood	SRR13804628	ENCSR604QMH	Intestine
ERR1232289	EGAD00001002504	Blood	SRR13804629	ENCSR604QMH	Intestine
ERR589947	EGAD00001002504	Blood	SRR13804630	ENCSR604QMH	Intestine
ERR364284	EGAD00001002504	Blood	SRR13804631	ENCSR604QMH	Intestine
ERR327560	EGAD00001002504	Blood	SRR13804632	ENCSR604QMH	Intestine
ERR589994	EGAD00001002504	Blood	SRR13804633	ENCSR604QMH	Intestine
ERR327557	EGAD00001002504	Blood	SRR5832908	ENCSR621BZD	Intestine
ERR327614	EGAD00001002504	Blood	SRR5832909	ENCSR621BZD	Intestine
ERR327613	EGAD00001002504	Blood	SRR5832910	ENCSR621BZD	Intestine
ERR589948	EGAD00001002504	Blood	SRR5832911	ENCSR621BZD	Intestine
ERR1043070	EGAD00001002504	Blood	SRR5832912	ENCSR621BZD	Intestine
ERR327564	EGAD00001002504	Blood	SRR5832913	ENCSR621BZD	Intestine
ERR589944	EGAD00001002504	Blood	SRR10388522	ENCSR632SLJ	Intestine
ERR327556	EGAD00001002504	Blood	SRR10388523	ENCSR632SLJ	Intestine
ERR589951	EGAD00001002504	Blood	SRR10388524	ENCSR632SLJ	Intestine
ERR1043125	EGAD00001002504	Blood	SRR10388525	ENCSR632SLJ	Intestine
ERR738682	EGAD00001002504	Blood	SRR10838161	ENCSR640XRV	Intestine
ERR327569	EGAD00001002504	Blood	SRR10838162	ENCSR640XRV	Intestine
ERR1232228	EGAD00001002504	Blood	SRR10838163	ENCSR640XRV	Intestine
ERR598717	EGAD00001002504	Blood	SRR10838164	ENCSR640XRV	Intestine
ERR465974	EGAD00001002504	Blood	SRR10838165	ENCSR640XRV	Intestine
ERR327583	EGAD00001002504	Blood	SRR10838166	ENCSR640XRV	Intestine
ERR327621	EGAD00001002504	Blood	SRR10838167	ENCSR640XRV	Intestine
ERR266326	EGAD00001002504	Blood	SRR10838168	ENCSR640XRV	Intestine
ERR327620	EGAD00001002504	Blood	SRR10838169	ENCSR640XRV	Intestine
ERR466036	EGAD00001002504	Blood	SRR10838170	ENCSR640XRV	Intestine
ERR589993	EGAD00001002504	Blood	SRR10838171	ENCSR640XRV	Intestine
ERR1223466	EGAD00001002504	Blood	SRR10838172	ENCSR640XRV	Intestine
ERR466037	EGAD00001002504	Blood	SRR10838173	ENCSR640XRV	Intestine
ERR327570	EGAD00001002504	Blood	SRR10838174	ENCSR640XRV	Intestine
ERR327619	EGAD00001002504	Blood	SRR10838175	ENCSR641SDI	Intestine
ERR466034	EGAD00001002504	Blood	SRR10838176	ENCSR641SDI	Intestine
ERR327554	EGAD00001002504	Blood	SRR10838177	ENCSR641SDI	Intestine
ERR589945	EGAD00001002504	Blood	SRR10838178	ENCSR641SDI	Intestine
ERR327549	EGAD00001002504	Blood	SRR10838183	ENCSR643KID	Intestine
ERR589946	EGAD00001002504	Blood	SRR10838184	ENCSR643KID	Intestine
ERR327623	EGAD00001002504	Blood	SRR10838185	ENCSR643KID	Intestine
ERR466017	EGAD00001002504	Blood	SRR10838186	ENCSR643KID	Intestine
ERR327618	EGAD00001002504	Blood	SRR10838187	ENCSR643KID	Intestine
ERR1043126	EGAD00001002504	Blood	SRR10838188	ENCSR643KID	Intestine
ERR327624	EGAD00001002504	Blood	SRR10838189	ENCSR643KID	Intestine
ERR738672	EGAD00001002504	Blood	SRR10838190	ENCSR643KID	Intestine
ERR364276	EGAD00001002504	Blood	SRR10838191	ENCSR643KID	Intestine
ERR589996	EGAD00001002504	Blood	SRR10838192	ENCSR643KID	Intestine
ERR266313	EGAD00001002504	Blood	SRR10838193	ENCSR643KID	Intestine
ERR589995	EGAD00001002504	Blood	SRR10838194	ENCSR643KID	Intestine
ERR1043069	EGAD00001002504	Blood	SRR10838195	ENCSR643KID	Intestine
ERR327545	EGAD00001002504	Blood	SRR10838196	ENCSR643KID	Intestine
ERR327566	EGAD00001002504	Blood	SRR10388536	ENCSR654KVJ	Intestine
ERR327615	EGAD00001002504	Blood	SRR10388537	ENCSR654KVJ	Intestine
ERR589987	EGAD00001002504	Blood	SRR10388538	ENCSR654KVJ	Intestine
ERR466035	EGAD00001002504	Blood	SRR10388539	ENCSR654KVJ	Intestine
ERR327553	EGAD00001002504	Blood	SRR10388540	ENCSR667SCY	Intestine
ERR327582	EGAD00001002504	Blood	SRR10388541	ENCSR667SCY	Intestine
ERR327622	EGAD00001002504	Blood	SRR10388542	ENCSR667SCY	Intestine
ERR1419020	EGAD00001002510	Blood	SRR10388543	ENCSR667SCY	Intestine
ERR1043095	EGAD00001002514	Blood	SRR5832937	ENCSR682GOI	Intestine
ERR1043013	EGAD00001002514	Blood	SRR5832938	ENCSR682GOI	Intestine
ERR1042967	EGAD00001002514	Blood	SRR10838235	ENCSR684EPX	Intestine
ERR1043096	EGAD00001002514	Blood	SRR10838236	ENCSR684EPX	Intestine
ERR863631	EGAD00001002514	Blood	SRR10838237	ENCSR684EPX	Intestine
ERR863603	EGAD00001002514	Blood	SRR10838238	ENCSR684EPX	Intestine
ERR1419014	EGAD00001002514	Blood	SRR10838319	ENCSR718LSM	Intestine
ERR863610	EGAD00001002514	Blood	SRR10838320	ENCSR718LSM	Intestine
ERR648122	EGAD00001002515	Blood	SRR10838321	ENCSR718LSM	Intestine
ERR327571	EGAD00001002515	Blood	SRR10838322	ENCSR718LSM	Intestine
ERR327611	EGAD00001002515	Blood	SRR10838323	ENCSR718LSM	Intestine
ERR364287	EGAD00001002515	Blood	SRR10838324	ENCSR718LSM	Intestine
ERR1223468	EGAD00001002515	Blood	SRR10388634	ENCSR734ZTQ	Intestine
ERR327561	EGAD00001002515	Blood	SRR10388635	ENCSR734ZTQ	Intestine
ERR648125	EGAD00001002515	Blood	SRR10388636	ENCSR734ZTQ	Intestine
ERR327603	EGAD00001002515	Blood	SRR10388637	ENCSR734ZTQ	Intestine
ERR648123	EGAD00001002515	Blood	SRR10388638	ENCSR734ZTQ	Intestine
ERR648129	EGAD00001002515	Blood	SRR10388639	ENCSR734ZTQ	Intestine
ERR327626	EGAD00001002515	Blood	SRR10838337	ENCSR735VKO	Intestine
ERR327625	EGAD00001002515	Blood	SRR10838338	ENCSR735VKO	Intestine
ERR1043071	EGAD00001002515	Blood	SRR10838339	ENCSR735VKO	Intestine
ERR364246	EGAD00001002515	Blood	SRR10838340	ENCSR735VKO	Intestine
ERR327567	EGAD00001002515	Blood	SRR10838345	ENCSR749ABB	Intestine
ERR1043127	EGAD00001002515	Blood	SRR10838346	ENCSR749ABB	Intestine
ERR266322	EGAD00001002515	Blood	SRR10838347	ENCSR749ABB	Intestine
ERR327551	EGAD00001002515	Blood	SRR10838348	ENCSR749ABB	Intestine
ERR589957	EGAD00001002515	Blood	SRR10838349	ENCSR749ABB	Intestine
ERR327612	EGAD00001002515	Blood	SRR10838350	ENCSR749ABB	Intestine
ERR327546	EGAD00001002515	Blood	SRR10838351	ENCSR749ABB	Intestine
ERR327634	EGAD00001002515	Blood	SRR10838352	ENCSR749ABB	Intestine
ERR738678	EGAD00001002515	Blood	SRR10838353	ENCSR749ABB	Intestine
ERR327616	EGAD00001002515	Blood	SRR10838354	ENCSR749ABB	Intestine
ERR1232278	EGAD00001002515	Blood	SRR10838355	ENCSR749ABB	Intestine
ERR648126	EGAD00001002515	Blood	SRR10838356	ENCSR749ABB	Intestine
ERR327555	EGAD00001002515	Blood	SRR10838357	ENCSR749ABB	Intestine
ERR364293	EGAD00001002515	Blood	SRR10838358	ENCSR749ABB	Intestine
ERR1232277	EGAD00001002515	Blood	SRR10838374	ENCSR758KRK	Intestine
ERR1232254	EGAD00001002515	Blood	SRR10838375	ENCSR758KRK	Intestine
ERR589943	EGAD00001002515	Blood	SRR10838376	ENCSR758KRK	Intestine
ERR1232290	EGAD00001002515	Blood	SRR10838377	ENCSR758KRK	Intestine
ERR466032	EGAD00001002515	Blood	SRR10838406	ENCSR774NRD	Intestine
ERR364285	EGAD00001002515	Blood	SRR10838407	ENCSR774NRD	Intestine
ERR327547	EGAD00001002515	Blood	SRR10838408	ENCSR774NRD	Intestine
ERR327581	EGAD00001002515	Blood	SRR10838409	ENCSR774NRD	Intestine
ERR327579	EGAD00001002515	Blood	SRR10838410	ENCSR775LGE	Intestine
ERR1043072	EGAD00001002515	Blood	SRR10838411	ENCSR775LGE	Intestine
ERR266318	EGAD00001002515	Blood	SRR10838412	ENCSR775LGE	Intestine
ERR648124	EGAD00001002515	Blood	SRR10838413	ENCSR775LGE	Intestine
ERR327627	EGAD00001002515	Blood	SRR10838414	ENCSR775LGE	Intestine
ERR364296	EGAD00001002515	Blood	SRR10838415	ENCSR775LGE	Intestine
ERR364288	EGAD00001002515	Blood	SRR5833000	ENCSR791LZY	Intestine
ERR1232292	EGAD00001002515	Blood	SRR5833001	ENCSR791LZY	Intestine
ERR364238	EGAD00001002515	Blood	SRR10838445	ENCSR792EDG	Intestine
ERR327558	EGAD00001002515	Blood	SRR10838446	ENCSR792EDG	Intestine
ERR327562	EGAD00001002515	Blood	SRR10838447	ENCSR792EDG	Intestine
ERR1232253	EGAD00001002515	Blood	SRR10838448	ENCSR792EDG	Intestine
ERR1232312	EGAD00001002515	Blood	SRR10838449	ENCSR792EDG	Intestine
ERR1232314	EGAD00001002515	Blood	SRR10838450	ENCSR792EDG	Intestine
ERR327559	EGAD00001002515	Blood	SRR10838452	ENCSR792VLP	Intestine
ERR648127	EGAD00001002515	Blood	SRR10838453	ENCSR792VLP	Intestine
ERR327575	EGAD00001002515	Blood	SRR10838454	ENCSR792VLP	Intestine
ERR327580	EGAD00001002515	Blood	SRR10838455	ENCSR792VLP	Intestine
ERR1223467	EGAD00001002515	Blood	SRR10838456	ENCSR792VLP	Intestine
ERR327548	EGAD00001002515	Blood	SRR10838457	ENCSR792VLP	Intestine
ERR648128	EGAD00001002515	Blood	SRR10838458	ENCSR792VLP	Intestine
ERR1232313	EGAD00001002515	Blood	SRR10838460	ENCSR792VLP	Intestine
ERR1232299	EGAD00001002517	Blood	SRR10838461	ENCSR792VLP	Intestine
ERR1232298	EGAD00001002517	Blood	SRR10838462	ENCSR792VLP	Intestine
ERR1230237	EGAD00001002517	Blood	SRR10838463	ENCSR792VLP	Intestine
ERR1233537	EGAD00001002517	Blood	SRR13804010	ENCSR793IKH	Intestine
ERR1233536	EGAD00001002517	Blood	SRR13804011	ENCSR793IKH	Intestine
ERR1230235	EGAD00001002517	Blood	SRR13804012	ENCSR793IKH	Intestine
ERR1230236	EGAD00001002517	Blood	SRR13804013	ENCSR793IKH	Intestine
ERR356821	EGAD00001002524	Blood	SRR13804014	ENCSR793IKH	Intestine
ERR592878	EGAD00001002524	Blood	SRR13804015	ENCSR793IKH	Intestine
ERR364327	EGAD00001002524	Blood	SRR10388729	ENCSR807XUB	Intestine
ERR356825	EGAD00001002524	Blood	SRR10388730	ENCSR807XUB	Intestine
ERR351343	EGAD00001002524	Blood	SRR10388731	ENCSR807XUB	Intestine
ERR327617	EGAD00001002524	Blood	SRR10388732	ENCSR807XUB	Intestine
ERR592876	EGAD00001002524	Blood	SRR5833109	ENCSR812POE	Intestine
ERR351316	EGAD00001002524	Blood	SRR5833110	ENCSR812POE	Intestine
ERR592879	EGAD00001002524	Blood	SRR10838499	ENCSR813ZEY	Intestine
ERR589988	EGAD00001002524	Blood	SRR10838500	ENCSR813ZEY	Intestine
ERR738686	EGAD00001002524	Blood	SRR10838501	ENCSR813ZEY	Intestine
ERR356822	EGAD00001002524	Blood	SRR10838502	ENCSR813ZEY	Intestine
ERR351317	EGAD00001002524	Blood	SRR10838503	ENCSR813ZEY	Intestine
ERR731955	EGAD00001002524	Blood	SRR10838504	ENCSR813ZEY	Intestine
ERR863622	EGAD00001002524	Blood	SRR10838505	ENCSR813ZEY	Intestine
ERR731955	EGAD00001002524	Blood	SRR10838506	ENCSR813ZEY	Intestine
ERR738684	EGAD00001002524	Blood	SRR10838507	ENCSR813ZEY	Intestine
ERR589969	EGAD00001002524	Blood	SRR10838508	ENCSR813ZEY	Intestine
ERR351342	EGAD00001002524	Blood	SRR10838509	ENCSR813ZEY	Intestine
ERR466019	EGAD00001002524	Blood	SRR10838510	ENCSR813ZEY	Intestine
ERR589990	EGAD00001002524	Blood	SRR5833018	ENCSR837SGJ	Intestine
ERR648132	EGAD00001002524	Blood	SRR5833019	ENCSR837SGJ	Intestine
ERR589959	EGAD00001002524	Blood	SRR5833026	ENCSR840VWD	Intestine
ERR863611	EGAD00001002524	Blood	SRR5833027	ENCSR840VWD	Intestine
ERR738666	EGAD00001002524	Blood	SRR5833028	ENCSR840VWD	Intestine
ERR466044	EGAD00001002524	Blood	SRR5833029	ENCSR840VWD	Intestine
ERR327609	EGAD00001002524	Blood	SRR10838534	ENCSR860GPM	Intestine
ERR592874	EGAD00001002524	Blood	SRR10838535	ENCSR860GPM	Intestine
ERR466062	EGAD00001002524	Blood	SRR10838536	ENCSR860GPM	Intestine
ERR592875	EGAD00001002524	Blood	SRR10838537	ENCSR860GPM	Intestine
ERR356826	EGAD00001002524	Blood	SRR16813778	ENCSR869XBX	Intestine
ERR731956	EGAD00001002524	Blood	SRR16813779	ENCSR869XBX	Intestine
ERR592877	EGAD00001002524	Blood	SRR16813780	ENCSR869XBX	Intestine
ERR1419019	EGAD00001002524	Blood	SRR16813781	ENCSR869XBX	Intestine
ERR356828	EGAD00001002524	Blood	SRR16813782	ENCSR869XBX	Intestine
ERR589958	EGAD00001002524	Blood	SRR16813783	ENCSR869XBX	Intestine
ERR731956	EGAD00001002524	Blood	SRR16813784	ENCSR869XBX	Intestine
ERR356824	EGAD00001002524	Blood	SRR16813785	ENCSR869XBX	Intestine
ERR356829	EGAD00001002524	Blood	SRR10838538	ENCSR874HIG	Intestine
ERR356830	EGAD00001002524	Blood	SRR10838539	ENCSR874HIG	Intestine
ERR351315	EGAD00001002524	Blood	SRR10838540	ENCSR874HIG	Intestine
ERR466013	EGAD00001002524	Blood	SRR10838541	ENCSR874HIG	Intestine
ERR356827	EGAD00001002524	Blood	SRR5339502	ENCSR878KIY	Intestine
ERR466018	EGAD00001002524	Blood	SRR5339503	ENCSR878KIY	Intestine
ERR863628	EGAD00001002524	Blood	SRR5339504	ENCSR878KIY	Intestine
ERR589989	EGAD00001002524	Blood	SRR5339505	ENCSR878KIY	Intestine
ERR356823	EGAD00001002524	Blood	SRR5339506	ENCSR878KIY	Intestine
ERR465991	EGAD00001002524	Blood	SRR5339507	ENCSR878KIY	Intestine
ERR364328	EGAD00001002524	Blood	SRR5833062	ENCSR900UIP	Intestine
			SRR5833063	ENCSR900UIP	Intestine
			SRR10838560	ENCSR912XAL	Intestine
			SRR10838561	ENCSR912XAL	Intestine
			SRR10838562	ENCSR912XAL	Intestine
			SRR10838563	ENCSR912XAL	Intestine
			SRR10838564	ENCSR912XAL	Intestine
			SRR10838565	ENCSR912XAL	Intestine
			SRR10838574	ENCSR927PLE	Intestine
			SRR10838575	ENCSR927PLE	Intestine
			SRR10838576	ENCSR927PLE	Intestine
			SRR10838577	ENCSR927PLE	Intestine
			SRR10838578	ENCSR927PLE	Intestine
			SRR10838579	ENCSR927PLE	Intestine
			SRR5833166	ENCSR933BVL	Intestine
			SRR5833167	ENCSR933BVL	Intestine
			SRR10838580	ENCSR937EVN	Intestine
			SRR10838581	ENCSR937EVN	Intestine
			SRR10838582	ENCSR937EVN	Intestine
			SRR10838583	ENCSR937EVN	Intestine
			SRR10388945	ENCSR960AAL	Intestine
			SRR10388946	ENCSR960AAL	Intestine
			SRR10388947	ENCSR960AAL	Intestine
			SRR10388948	ENCSR960AAL	Intestine
			SRR5833192	ENCSR982PLJ	Intestine
			SRR5833193	ENCSR982PLJ	Intestine
			SRR13804728	ENCSR988QEK	Intestine
			SRR13804729	ENCSR988QEK	Intestine
			SRR13804730	ENCSR988QEK	Intestine
			SRR13804731	ENCSR988QEK	Intestine
			SRR10838635	ENCSR998QKF	Intestine
			SRR10838636	ENCSR998QKF	Intestine
			SRR10838637	ENCSR998QKF	Intestine
			SRR10838638	ENCSR998QKF	Intestine
			SRR10838639	ENCSR998QKF	Intestine
			SRR10838640	ENCSR998QKF	Intestine
			ENCFF904ABZ	ENCSR731AIB	Liver
			ENCFF028LXW	ENCSR731AIB	Liver
			ENCFF383WSG	ENCSR731AIB	Liver
			ENCFF703RQQ	ENCSR731AIB	Liver
			ENCFF343NQV	ENCSR731AIB	Liver
			ENCFF587LGH	ENCSR731AIB	Liver
			ENCFF169QOC	ENCSR731AIB	Liver
			ENCFF140KUE	ENCSR731AIB	Liver
			ENCFF511CFE	ENCSR731AIB	Liver
			ENCFF005EFM	ENCSR731AIB	Liver
			ENCFF572FXS	ENCSR731AIB	Liver
			ENCFF682JLM	ENCSR731AIB	Liver
			ENCFF332JJE	ENCSR554XXQ	Liver
			ENCFF772MWE	ENCSR554XXQ	Liver
			ENCFF905IBQ	ENCSR554XXQ	Liver
			ENCFF117PBJ	ENCSR554XXQ	Liver
			ENCFF212ROP	ENCSR554XXQ	Liver
			ENCFF371CXF	ENCSR554XXQ	Liver
			ENCFF988MWT	ENCSR554XXQ	Liver
			ENCFF557MPE	ENCSR554XXQ	Liver
			ENCFF988BZC	ENCSR119XNK	Liver
			ENCFF102QNN	ENCSR119XNK	Liver
			ENCFF431CEU	ENCSR119XNK	Liver
			ENCFF647MXM	ENCSR119XNK	Liver
			ENCFF340JDY	ENCSR119XNK	Liver
			ENCFF617LEO	ENCSR119XNK	Liver
			ENCFF885UGZ	ENCSR119XNK	Liver
			ENCFF374KJP	ENCSR119XNK	Liver
			ENCFF187KVK	ENCSR533YIK	Liver
			ENCFF244TFS	ENCSR533YIK	Liver
			ENCFF469LIN	ENCSR533YIK	Liver
			ENCFF251DWG	ENCSR533YIK	Liver
			ENCFF779SXE	ENCSR533YIK	Liver
			ENCFF470YLD	ENCSR533YIK	Liver
			ENCFF400TOX	ENCSR533YIK	Liver
			ENCFF951OGL	ENCSR533YIK	Liver
			ENCFF959JPU	ENCSR927CRV	Liver
			ENCFF992LAP	ENCSR927CRV	Liver
			ENCFF353VAZ	ENCSR927CRV	Liver
			ENCFF109CZL	ENCSR927CRV	Liver
			ENCFF180YOP	ENCSR927CRV	Liver
			ENCFF446JAI	ENCSR927CRV	Liver
			ENCFF116SLH	ENCSR927CRV	Liver
			ENCFF809CSA	ENCSR927CRV	Liver
			ENCFF931EZZ	ENCSR981UJA	Liver
			ENCFF740NTK	ENCSR981UJA	Liver
			ENCFF020LUU	ENCSR981UJA	Liver
			ENCFF135NRF	ENCSR981UJA	Liver
			ENCFF944QYP	ENCSR637RLN	Liver
			ENCFF730TKN	ENCSR637RLN	Liver
			ENCFF951QVB	ENCSR637RLN	Liver
			ENCFF450OFS	ENCSR423SEX	Liver
			ENCFF263QOH	ENCSR423SEX	Liver
			ENCFF329NUR	ENCSR423SEX	Liver
			ENCFF723AIR	ENCSR423SEX	Liver
			ENCFF636HQZ	ENCSR423SEX	Liver
			ENCFF295LQX	ENCSR423SEX	Liver
			ENCFF440XCM	ENCSR423SEX	Liver
			ENCFF647XIM	ENCSR423SEX	Liver
			ENCFF555QUB	ENCSR249KTU	Liver
			ENCFF431SXI	ENCSR249KTU	Liver
			ENCFF223BDZ	ENCSR249KTU	Liver
			ENCFF925ALK	ENCSR249KTU	Liver
			ENCFF770PFD	ENCSR249KTU	Liver
			ENCFF359MEX	ENCSR249KTU	Liver
			ENCFF702BPS	ENCSR249KTU	Liver
			ENCFF420UQN	ENCSR249KTU	Liver
			ENCFF101JNN	ENCSR779ISJ	Liver
			ENCFF008XUT	ENCSR779ISJ	Liver
			ENCFF857XCM	ENCSR779ISJ	Liver
			ENCFF971RXA	ENCSR779ISJ	Liver
			ENCFF761WRE	ENCSR779ISJ	Liver
			ENCFF147ZHZ	ENCSR779ISJ	Liver
			ENCFF278SKM	ENCSR779ISJ	Liver
			ENCFF857KUW	ENCSR779ISJ	Liver
			ENCFF886UWF	ENCSR660PFN	Liver
			ENCFF348JGI	ENCSR660PFN	Liver
			ENCFF821ZOG	ENCSR660PFN	Liver
			ENCFF655GVG	ENCSR660PFN	Liver
			ENCFF408UXH	ENCSR660PFN	Liver
			ENCFF062ICS	ENCSR660PFN	Liver
			ENCFF092ABH	ENCSR660PFN	Liver
			ENCFF819VCT	ENCSR660PFN	Liver
			ENCFF717MSL	ENCSR511ICH	Liver
			ENCFF582GRL	ENCSR511ICH	Liver
			ENCFF346GDT	ENCSR511ICH	Liver
			ENCFF444ASU	ENCSR511ICH	Liver
			ENCFF772TCX	ENCSR511ICH	Liver
			ENCFF509AYP	ENCSR511ICH	Liver
			ENCFF035QZV	ENCSR511ICH	Liver
			ENCFF724EIL	ENCSR511ICH	Liver
			ENCFF134DLN	ENCSR589JCY	Liver
			ENCFF712TAA	ENCSR589JCY	Liver
			ENCFF594ZTO	ENCSR589JCY	Liver
			ENCFF344RIE	ENCSR589JCY	Liver
			ENCFF352QXG	ENCSR589JCY	Liver
			ENCFF030MBK	ENCSR589JCY	Liver
			ENCFF302LYC	ENCSR589JCY	Liver
			ENCFF476CVB	ENCSR589JCY	Liver
			ENCFF453NSU	ENCSR281JVN	Liver
			ENCFF678PRO	ENCSR281JVN	Liver
			ENCFF885SNU	ENCSR281JVN	Liver
			ENCFF466SUT	ENCSR281JVN	Liver
			ENCFF445RJC	ENCSR281JVN	Liver
			ENCFF189NEZ	ENCSR281JVN	Liver
			ENCFF085KFX	ENCSR281JVN	Liver
			ENCFF415NNX	ENCSR281JVN	Liver
			ENCFF165SEA	ENCSR611CHC	Liver
			ENCFF901NKG	ENCSR611CHC	Liver
			ENCFF529YAQ	ENCSR611CHC	Liver
			ENCFF387FFY	ENCSR611CHC	Liver
			ENCFF410FYK	ENCSR611CHC	Liver
			ENCFF816RPL	ENCSR611CHC	Liver
			ENCFF146MJO	ENCSR611CHC	Liver
			ENCFF725HKN	ENCSR611CHC	Liver
			ENCFF041QHE	ENCSR786ALM	Liver
			ENCFF960ODY	ENCSR786ALM	Liver
			ENCFF546DQG	ENCSR786ALM	Liver
			ENCFF886GHE	ENCSR786ALM	Liver
			ENCFF952BON	ENCSR786ALM	Liver
			ENCFF688WDL	ENCSR786ALM	Liver
			ENCFF008IYS	ENCSR786ALM	Liver
			ENCFF791UBL	ENCSR786ALM	Liver
			ENCFF528VML	ENCSR590AJV	Liver
			ENCFF270GUZ	ENCSR590AJV	Liver
			ENCFF584PGP	ENCSR590AJV	Liver
			ENCFF125DTJ	ENCSR590AJV	Liver
			ENCFF147HUX	ENCSR590AJV	Liver
			ENCFF750BVA	ENCSR590AJV	Liver
			ENCFF565DPB	ENCSR590AJV	Liver
			ENCFF344VKN	ENCSR590AJV	Liver
			ENCFF769FRD	ENCSR400GCO	Liver
			ENCFF319IYT	ENCSR400GCO	Liver
			ENCFF728BHY	ENCSR400GCO	Liver
			ENCFF246FDU	ENCSR400GCO	Liver
			ENCFF464YHI	ENCSR400GCO	Liver
			ENCFF145QTL	ENCSR400GCO	Liver
			ENCFF910MQA	ENCSR400GCO	Liver
			ENCFF045XZW	ENCSR400GCO	Liver
			ENCFF065PGS	ENCSR864OOO	Liver
			ENCFF745TQU	ENCSR864OOO	Liver
			ENCFF150ULZ	ENCSR864OOO	Liver
			ENCFF042WUZ	ENCSR864OOO	Liver
			ENCFF904HAT	ENCSR864OOO	Liver
			ENCFF545LYP	ENCSR864OOO	Liver
			ENCFF289EPV	ENCSR864OOO	Liver
			ENCFF767NLT	ENCSR864OOO	Liver
			ENCFF124FQL	ENCSR810PYW	Liver
			ENCFF842ZII	ENCSR810PYW	Liver
			ENCFF430CXR	ENCSR810PYW	Liver
			ENCFF003GNO	ENCSR810PYW	Liver
			ENCFF295BKX	ENCSR810PYW	Liver
			ENCFF950DTL	ENCSR810PYW	Liver
			ENCFF154HHB	ENCSR810PYW	Liver
			ENCFF870GAX	ENCSR810PYW	Liver
			ENCFF727PCJ	ENCSR080QVO	Liver
			ENCFF632FFI	ENCSR080QVO	Liver
			ENCFF846KJG	ENCSR489DUV	Liver
			ENCFF303QQP	ENCSR489DUV	Liver
			ENCFF997MXD	ENCSR034BEQ	Liver
			ENCFF980AUK	ENCSR034BEQ	Liver
			ENCFF753JZJ	ENCSR689QUB	Liver
			ENCFF442QTG	ENCSR689QUB	Liver
			ENCFF030JBI	ENCSR442ZOI	Liver
			ENCFF767RUN	ENCSR442ZOI	Liver
			ENCFF964RWY	ENCSR442ZOI	Liver
			ENCFF640DGP	ENCSR442ZOI	Liver
			ENCFF323SWS	ENCSR758GMX	Liver
			ENCFF405BBY	ENCSR758GMX	Liver
			ENCFF440LWH	ENCSR758GMX	Liver
			ENCFF193FJJ	ENCSR758GMX	Liver
			ENCFF074RQF	ENCSR614JFD	Liver
			ENCFF474OAB	ENCSR614JFD	Liver
			ENCFF778YPM	ENCSR507UDH	Liver
			ENCFF343XGX	ENCSR507UDH	Liver
			ENCFF667AVG	ENCSR507UDH	Liver
			ENCFF164BFO	ENCSR344TLI	Liver
			ENCFF538CJN	ENCSR344TLI	Liver
			ENCFF791EGJ	ENCSR344TLI	Liver
			ENCFF715KVW	ENCSR344TLI	Liver
			ENCFF167TRL	ENCSR344TLI	Liver
			ENCFF763VAH	ENCSR344TLI	Liver
			ENCFF758SRN	ENCSR436JNB	Spleen
			ENCFF689COG	ENCSR436JNB	Spleen
			ENCFF317IDE	ENCSR436JNB	Spleen
			ENCFF010GVM	ENCSR436JNB	Spleen
			ENCFF901VRJ	ENCSR436JNB	Spleen
			ENCFF091YBK	ENCSR436JNB	Spleen
			ENCFF742IFJ	ENCSR436JNB	Spleen
			ENCFF417BHH	ENCSR436JNB	Spleen
			ENCFF189GDS	ENCSR692WNL	Spleen
			ENCFF722BHP	ENCSR692WNL	Spleen
			ENCFF863JQE	ENCSR692WNL	Spleen
			ENCFF844WOG	ENCSR692WNL	Spleen
			ENCFF326ASR	ENCSR692WNL	Spleen
			ENCFF829QBL	ENCSR692WNL	Spleen
			ENCFF183QSJ	ENCSR692WNL	Spleen
			ENCFF371QGN	ENCSR692WNL	Spleen
			ENCFF549RQR	ENCSR826MTK	Spleen
			ENCFF151ODW	ENCSR826MTK	Spleen
			ENCFF334CIE	ENCSR826MTK	Spleen
			ENCFF978HAZ	ENCSR826MTK	Spleen
			ENCFF219DGE	ENCSR826MTK	Spleen
			ENCFF126BKI	ENCSR826MTK	Spleen
			ENCFF863MUO	ENCSR826MTK	Spleen
			ENCFF142OPQ	ENCSR826MTK	Spleen
			ENCFF549MFI	ENCSR826MTK	Spleen
			ENCFF053CAA	ENCSR826MTK	Spleen
			ENCFF683LQV	ENCSR826MTK	Spleen
			ENCFF789ZEG	ENCSR826MTK	Spleen
			ENCFF191WLN	ENCSR826MTK	Spleen
			ENCFF890QKD	ENCSR826MTK	Spleen
			ENCFF923UGJ	ENCSR826MTK	Spleen
			ENCFF725AYE	ENCSR826MTK	Spleen
			ENCFF571XLG	ENCSR205APY	Spleen
			ENCFF575CSH	ENCSR205APY	Spleen
			ENCFF291TKP	ENCSR205APY	Spleen
			ENCFF186SOQ	ENCSR205APY	Spleen
			ENCFF851PKD	ENCSR205APY	Spleen
			ENCFF212GLV	ENCSR205APY	Spleen
			ENCFF025SWE	ENCSR205APY	Spleen
			ENCFF522JXA	ENCSR205APY	Spleen
			ENCFF217IJW	ENCSR593INW	Spleen
			ENCFF869PEP	ENCSR593INW	Spleen
			ENCFF758QZC	ENCSR593INW	Spleen
			ENCFF440LEQ	ENCSR593INW	Spleen
			ENCFF800EUJ	ENCSR593INW	Spleen
			ENCFF118GIP	ENCSR593INW	Spleen
			ENCFF753OIX	ENCSR593INW	Spleen
			ENCFF133JDR	ENCSR593INW	Spleen
			ENCFF420QFH	ENCSR593INW	Spleen
			ENCFF038GOC	ENCSR593INW	Spleen
			ENCFF707OJX	ENCSR593INW	Spleen
			ENCFF182FPX	ENCSR593INW	Spleen
			ENCFF472SZN	ENCSR593INW	Spleen
			ENCFF986ZAV	ENCSR593INW	Spleen
			ENCFF451NBT	ENCSR726HTS	Spleen
			ENCFF234GKO	ENCSR726HTS	Spleen
			ENCFF894ZNZ	ENCSR726HTS	Spleen
			ENCFF674BQL	ENCSR726HTS	Spleen
			ENCFF030XCQ	ENCSR726HTS	Spleen
			ENCFF132QCA	ENCSR726HTS	Spleen
			ENCFF574KIM	ENCSR726HTS	Spleen
			ENCFF007TBV	ENCSR726HTS	Spleen
			ENCFF954CEB	ENCSR726HTS	Spleen
			ENCFF547YCY	ENCSR726HTS	Spleen
			ENCFF824EOS	ENCSR726HTS	Spleen
			ENCFF793WPL	ENCSR726HTS	Spleen
			ENCFF023RKK	ENCSR726HTS	Spleen
			ENCFF069LYC	ENCSR726HTS	Spleen
			ENCFF200KNW	ENCSR787YHR	Spleen
			ENCFF268OZQ	ENCSR787YHR	Spleen
			ENCFF480GKG	ENCSR787YHR	Spleen
			ENCFF863WOR	ENCSR787YHR	Spleen
			ENCFF081CPD	ENCSR787YHR	Spleen
			ENCFF751IJU	ENCSR787YHR	Spleen
			ENCFF060MJQ	ENCSR787YHR	Spleen
			ENCFF952RFZ	ENCSR787YHR	Spleen
			ENCFF687XFT	ENCSR787YHR	Spleen
			ENCFF128KDM	ENCSR787YHR	Spleen
			ENCFF606ZDN	ENCSR787YHR	Spleen
			ENCFF376CQN	ENCSR787YHR	Spleen
			ENCFF490ZLM	ENCSR787YHR	Spleen
			ENCFF745NIO	ENCSR787YHR	Spleen
			ENCFF226KAM	ENCSR105URN	Spleen
			ENCFF931VOQ	ENCSR105URN	Spleen
			ENCFF247WRE	ENCSR105URN	Spleen
			ENCFF044RKK	ENCSR105URN	Spleen
			ENCFF888CWD	ENCSR105URN	Spleen
			ENCFF945IER	ENCSR105URN	Spleen
			ENCFF879OIR	ENCSR105URN	Spleen
			ENCFF654WAT	ENCSR105URN	Spleen
			ENCFF789JIH	ENCSR105URN	Spleen
			ENCFF240JBX	ENCSR105URN	Spleen
			ENCFF288EFV	ENCSR105URN	Spleen
			ENCFF396NDX	ENCSR105URN	Spleen
			ENCFF780FWB	ENCSR105URN	Spleen
			ENCFF974JUK	ENCSR105URN	Spleen
			ENCFF342AVB	ENCSR377ILM	Spleen
			ENCFF952RFQ	ENCSR377ILM	Spleen
			ENCFF093MOL	ENCSR377ILM	Spleen
			ENCFF298WNQ	ENCSR377ILM	Spleen
			ENCFF681BDD	ENCSR377ILM	Spleen
			ENCFF737FGD	ENCSR377ILM	Spleen
			ENCFF834IRG	ENCSR377ILM	Spleen
			ENCFF995DKO	ENCSR377ILM	Spleen
			ENCFF456JLJ	ENCSR377ILM	Spleen
			ENCFF328VTG	ENCSR377ILM	Spleen
			ENCFF436VXG	ENCSR377ILM	Spleen
			ENCFF857FAB	ENCSR377ILM	Spleen
			ENCFF564HYL	ENCSR377ILM	Spleen
			ENCFF347ADG	ENCSR377ILM	Spleen
			ENCFF438MDV	ENCSR635IRN	Spleen
			ENCFF995MQG	ENCSR635IRN	Spleen
			ENCFF103LJI	ENCSR635IRN	Spleen
			ENCFF615LJA	ENCSR635IRN	Spleen
			ENCFF975EAE	ENCSR635IRN	Spleen
			ENCFF320SWQ	ENCSR635IRN	Spleen
			ENCFF819ZOZ	ENCSR635IRN	Spleen
			ENCFF997VYD	ENCSR635IRN	Spleen
			ENCFF247LMM	ENCSR635IRN	Spleen
			ENCFF141VCB	ENCSR635IRN	Spleen
			ENCFF961YKP	ENCSR635IRN	Spleen
			ENCFF603VTS	ENCSR635IRN	Spleen
			ENCFF625CBF	ENCSR668GBL	Spleen
			ENCFF105TJR	ENCSR668GBL	Spleen
			ENCFF152NQY	ENCSR668GBL	Spleen
			ENCFF885LFQ	ENCSR668GBL	Spleen
			ENCFF600SAV	ENCSR668GBL	Spleen
			ENCFF814AUB	ENCSR668GBL	Spleen
			ENCFF203TIC	ENCSR668GBL	Spleen
			ENCFF515TGH	ENCSR668GBL	Spleen
			ENCFF305JXR	ENCSR668GBL	Spleen
			ENCFF387OOU	ENCSR668GBL	Spleen
			ENCFF538TWV	ENCSR668GBL	Spleen
			ENCFF577ADA	ENCSR668GBL	Spleen
			ENCFF086PRM	ENCSR668GBL	Spleen
			ENCFF540HTQ	ENCSR668GBL	Spleen
			ENCFF998RTI	ENCSR668GBL	Spleen
			ENCFF526WQQ	ENCSR668GBL	Spleen
			ENCFF824FGP	ENCSR080JPX	Spleen
			ENCFF104TNN	ENCSR080JPX	Spleen
			ENCFF191FCE	ENCSR080JPX	Spleen
			ENCFF904TMQ	ENCSR080JPX	Spleen
			ENCFF063MXD	ENCSR080JPX	Spleen
			ENCFF363YKA	ENCSR080JPX	Spleen
			ENCFF232SYN	ENCSR080JPX	Spleen
			ENCFF591XCK	ENCSR080JPX	Spleen
			ENCFF505TQI	ENCSR080JPX	Spleen
			ENCFF493UPM	ENCSR080JPX	Spleen
			ENCFF772MQU	ENCSR080JPX	Spleen
			ENCFF386HQS	ENCSR080JPX	Spleen
			ENCFF052LMF	ENCSR080JPX	Spleen
			ENCFF883ZZN	ENCSR080JPX	Spleen
			ENCFF295CPV	ENCSR472BXE	Spleen
			ENCFF654ZDV	ENCSR472BXE	Spleen
			ENCFF479YPF	ENCSR472BXE	Spleen
			ENCFF629FQK	ENCSR472BXE	Spleen
			ENCFF496GGK	ENCSR472BXE	Spleen
			ENCFF812YRK	ENCSR472BXE	Spleen
			ENCFF475GRA	ENCSR472BXE	Spleen
			ENCFF227DWD	ENCSR472BXE	Spleen
			ENCFF692VMI	ENCSR981USF	Spleen
			ENCFF411SOJ	ENCSR981USF	Spleen
			ENCFF661WBH	ENCSR981USF	Spleen
			ENCFF665WTZ	ENCSR981USF	Spleen
			ENCFF092QZZ	ENCSR981USF	Spleen
			ENCFF723VAX	ENCSR981USF	Spleen
			ENCFF574GRS	ENCSR981USF	Spleen
			ENCFF022RKK	ENCSR981USF	Spleen
			ENCFF919OKV	ENCSR589DBF	Spleen
			ENCFF105OHU	ENCSR589DBF	Spleen
			ENCFF400KMG	ENCSR589DBF	Spleen
			ENCFF357MVO	ENCSR589DBF	Spleen
			ENCFF622UWG	ENCSR589DBF	Spleen
			ENCFF863SRM	ENCSR589DBF	Spleen
			ENCFF463XQE	ENCSR589DBF	Spleen
			ENCFF395NSI	ENCSR589DBF	Spleen
			ENCFF553JXX	ENCSR589DBF	Spleen
			ENCFF542GTV	ENCSR589DBF	Spleen
			ENCFF354WFS	ENCSR589DBF	Spleen
			ENCFF256OTK	ENCSR589DBF	Spleen
			ENCFF463OZG	ENCSR845NXO	Spleen
			ENCFF820TSC	ENCSR845NXO	Spleen
			ENCFF728POZ	ENCSR845NXO	Spleen
			ENCFF132YBK	ENCSR845NXO	Spleen
			ENCFF374KSI	ENCSR845NXO	Spleen
			ENCFF502EQY	ENCSR845NXO	Spleen
			ENCFF876NYE	ENCSR845NXO	Spleen
			ENCFF334OYD	ENCSR845NXO	Spleen
			ENCFF130EQH	ENCSR709APF	Spleen
			ENCFF428YMH	ENCSR709APF	Spleen
			ENCFF631SPA	ENCSR709APF	Spleen
			ENCFF171SOB	ENCSR709APF	Spleen
			ENCFF458HUL	ENCSR709APF	Spleen
			ENCFF298IVH	ENCSR709APF	Spleen
			ENCFF723DXL	ENCSR709APF	Spleen
			ENCFF578FWG	ENCSR709APF	Spleen
			ENCFF939LTN	ENCSR709APF	Spleen
			ENCFF240YMD	ENCSR709APF	Spleen
			ENCFF793YGT	ENCSR709APF	Spleen
			ENCFF721HHL	ENCSR709APF	Spleen
			ENCFF295LTV	ENCSR709APF	Spleen
			ENCFF129UQH	ENCSR709APF	Spleen
			ENCFF621OGK	ENCSR709APF	Spleen
			ENCFF975OCG	ENCSR709APF	Spleen
			ENCFF397VNS	ENCSR709APF	Spleen
			ENCFF128VDI	ENCSR709APF	Spleen
			ENCFF035TWK	ENCSR589TCU	Spleen
			ENCFF935HOQ	ENCSR589TCU	Spleen
			ENCFF367XWW	ENCSR589TCU	Spleen
			ENCFF924XII	ENCSR589TCU	Spleen
			ENCFF976CAZ	ENCSR589TCU	Spleen
			ENCFF493VBS	ENCSR589TCU	Spleen
			ENCFF623VKC	ENCSR589TCU	Spleen
			ENCFF312NJU	ENCSR589TCU	Spleen
			ENCFF264EKM	ENCSR589TCU	Spleen
			ENCFF450YXD	ENCSR589TCU	Spleen
			ENCFF818BCM	ENCSR589TCU	Spleen
			ENCFF462AMF	ENCSR589TCU	Spleen
			ENCFF944XGP	ENCSR589TCU	Spleen
			ENCFF045HMN	ENCSR589TCU	Spleen
			ENCFF473FYQ	ENCSR197QDK	Spleen
			ENCFF156PMC	ENCSR197QDK	Spleen
			ENCFF761RNN	ENCSR197QDK	Spleen
			ENCFF026MFR	ENCSR197QDK	Spleen
			ENCFF686AJL	ENCSR197QDK	Spleen
			ENCFF333RSU	ENCSR197QDK	Spleen
			ENCFF008UDR	ENCSR197QDK	Spleen
			ENCFF431XCF	ENCSR197QDK	Spleen
			ENCFF936IUQ	ENCSR197QDK	Spleen
			ENCFF139TVZ	ENCSR197QDK	Spleen
			ENCFF753BLY	ENCSR197QDK	Spleen
			ENCFF667WJR	ENCSR197QDK	Spleen
			ENCFF049TVN	ENCSR197QDK	Spleen
			ENCFF879CMV	ENCSR197QDK	Spleen
			ENCFF133TWB	ENCSR197QDK	Spleen
			ENCFF047DYL	ENCSR197QDK	Spleen
			ENCFF426DKO	ENCSR761LTB	Spleen
			ENCFF379OBH	ENCSR761LTB	Spleen
			ENCFF062JDV	ENCSR761LTB	Spleen
			ENCFF303QHS	ENCSR761LTB	Spleen
			ENCFF281HIS	ENCSR161FEJ	Spleen
			ENCFF614UNC	ENCSR161FEJ	Spleen
			ENCFF388WXK	ENCSR161FEJ	Spleen
			ENCFF022HQC	ENCSR161FEJ	Spleen
			ENCFF844BIJ	ENCSR161FEJ	Spleen
			ENCFF613FYX	ENCSR161FEJ	Spleen
			ENCFF481QPQ	ENCSR161FEJ	Spleen
			ENCFF495EMV	ENCSR161FEJ	Spleen
			ENCFF409SOZ	ENCSR161FEJ	Spleen
			ENCFF824UFC	ENCSR161FEJ	Spleen
			ENCFF588BYY	ENCSR161FEJ	Spleen
			ENCFF915OGK	ENCSR161FEJ	Spleen
			ENCFF945BHP	ENCSR272CIV	Spleen
			ENCFF436JLW	ENCSR272CIV	Spleen
			ENCFF977JJH	ENCSR272CIV	Spleen
			ENCFF724AXY	ENCSR272CIV	Spleen
			ENCFF817MTA	ENCSR272CIV	Spleen
			ENCFF148FEU	ENCSR272CIV	Spleen
			ENCFF857QIQ	ENCSR272CIV	Spleen
			ENCFF888FAI	ENCSR272CIV	Spleen
			ENCFF334UAT	ENCSR272CIV	Spleen
			ENCFF005MKC	ENCSR272CIV	Spleen
			ENCFF139EVN	ENCSR272CIV	Spleen
			ENCFF017DDA	ENCSR272CIV	Spleen
			ENCFF209HPH	ENCSR272CIV	Spleen
			ENCFF955GMH	ENCSR272CIV	Spleen
			ENCFF101ZGL	ENCSR272CIV	Spleen
			ENCFF308SXY	ENCSR272CIV	Spleen
			ENCFF567DPF	ENCSR091IRL	Spleen
			ENCFF397LQS	ENCSR091IRL	Spleen
			ENCFF714VWU	ENCSR091IRL	Spleen
			ENCFF935CTO	ENCSR091IRL	Spleen
			ENCFF486LNL	ENCSR091IRL	Spleen
			ENCFF874PRI	ENCSR091IRL	Spleen
			ENCFF062ULR	ENCSR091IRL	Spleen
			ENCFF221VTB	ENCSR091IRL	Spleen
			ENCFF419BDA	ENCSR091IRL	Spleen
			ENCFF515GPG	ENCSR091IRL	Spleen
			ENCFF835YDU	ENCSR091IRL	Spleen
			ENCFF970BNV	ENCSR091IRL	Spleen
			ENCFF243WVW	ENCSR091IRL	Spleen
			ENCFF819MLC	ENCSR091IRL	Spleen
			ENCFF354IUU	ENCSR659RJP	Spleen
			ENCFF684TPG	ENCSR659RJP	Spleen
			ENCFF941UAF	ENCSR659RJP	Spleen
			ENCFF339NDF	ENCSR659RJP	Spleen
			ENCFF984QNB	ENCSR659RJP	Spleen
			ENCFF246LIP	ENCSR659RJP	Spleen
			ENCFF506RPP	ENCSR659RJP	Spleen
			ENCFF531LXZ	ENCSR659RJP	Spleen
			ENCFF433WUK	ENCSR659RJP	Spleen
			ENCFF557LII	ENCSR659RJP	Spleen
			ENCFF968QCL	ENCSR659RJP	Spleen
			ENCFF078ABR	ENCSR659RJP	Spleen
			ENCFF493AKV	ENCSR506DCR	Spleen
			ENCFF761ANG	ENCSR506DCR	Spleen
			ENCFF175RJW	ENCSR506DCR	Spleen
			ENCFF699KZT	ENCSR506DCR	Spleen
			ENCFF895WMH	ENCSR506DCR	Spleen
			ENCFF922HLH	ENCSR506DCR	Spleen
			ENCFF511RNA	ENCSR506DCR	Spleen
			ENCFF618XXH	ENCSR506DCR	Spleen
			ENCFF499IZB	ENCSR506DCR	Spleen
			ENCFF387DGR	ENCSR506DCR	Spleen
			ENCFF993UTD	ENCSR506DCR	Spleen
			ENCFF083UXU	ENCSR506DCR	Spleen
			ENCFF099VSV	ENCSR506DCR	Spleen
			ENCFF208TXC	ENCSR506DCR	Spleen
			ENCFF946ZHG	ENCSR907JPV	Spleen
			ENCFF934OZA	ENCSR907JPV	Spleen
			ENCFF606EMZ	ENCSR907JPV	Spleen
			ENCFF320JSI	ENCSR907JPV	Spleen
			ENCFF447HGB	ENCSR907JPV	Spleen
			ENCFF213GSU	ENCSR907JPV	Spleen
			ENCFF003ORQ	ENCSR907JPV	Spleen
			ENCFF079PXS	ENCSR907JPV	Spleen
			ENCFF861PIX	ENCSR612GKP	Spleen
			ENCFF335NSF	ENCSR612GKP	Spleen
			ENCFF407GQY	ENCSR612GKP	Spleen
			ENCFF768LFF	ENCSR612GKP	Spleen
			ENCFF633OCZ	ENCSR612GKP	Spleen
			ENCFF910EDX	ENCSR612GKP	Spleen
			ENCFF788WQG	ENCSR612GKP	Spleen
			ENCFF607ZWI	ENCSR612GKP	Spleen
			ENCFF287OKD	ENCSR426VHO	Spleen
			ENCFF206CBY	ENCSR426VHO	Spleen
			ENCFF537VQM	ENCSR426VHO	Spleen
			ENCFF845LXK	ENCSR426VHO	Spleen
			ENCFF832LFB	ENCSR426VHO	Spleen
			ENCFF055HTK	ENCSR426VHO	Spleen
			ENCFF545NBT	ENCSR426VHO	Spleen
			ENCFF990BNJ	ENCSR426VHO	Spleen
			ENCFF061MTL	ENCSR426VHO	Spleen
			ENCFF419CCZ	ENCSR426VHO	Spleen
			ENCFF989KCU	ENCSR426VHO	Spleen
			ENCFF742JGZ	ENCSR426VHO	Spleen
			ENCFF228JKO	ENCSR343DFX	Spleen
			ENCFF092CZH	ENCSR343DFX	Spleen
			ENCFF288YPO	ENCSR343DFX	Spleen
			ENCFF746YOC	ENCSR343DFX	Spleen
			ENCFF870MFX	ENCSR343DFX	Spleen
			ENCFF756YKE	ENCSR343DFX	Spleen
			ENCFF632ZIJ	ENCSR343DFX	Spleen
			ENCFF060POO	ENCSR343DFX	Spleen
			ENCFF630VMJ	ENCSR450AOR	Spleen
			ENCFF210IPD	ENCSR450AOR	Spleen
			ENCFF076FTO	ENCSR450AOR	Spleen
			ENCFF484MZO	ENCSR450AOR	Spleen
			ENCFF422LLY	ENCSR450AOR	Spleen
			ENCFF621MKE	ENCSR450AOR	Spleen
			ENCFF419OIH	ENCSR450AOR	Spleen
			ENCFF961DTR	ENCSR450AOR	Spleen
			ENCFF977TSS	ENCSR756THI	Spleen
			ENCFF469HLS	ENCSR756THI	Spleen
			ENCFF304COP	ENCSR756THI	Spleen
			ENCFF159UFT	ENCSR756THI	Spleen
			ENCFF426KMD	ENCSR756THI	Spleen
			ENCFF957CWT	ENCSR756THI	Spleen
			ENCFF973RHJ	ENCSR756THI	Spleen
			ENCFF784SJH	ENCSR756THI	Spleen
			ENCFF851RXE	ENCSR401KZW	Spleen
			ENCFF014COL	ENCSR401KZW	Spleen
			ENCFF664VDZ	ENCSR401KZW	Spleen
			ENCFF235WAR	ENCSR401KZW	Spleen
			ENCFF290ZYP	ENCSR401KZW	Spleen
			ENCFF553ZRR	ENCSR401KZW	Spleen
			ENCFF892CVQ	ENCSR401KZW	Spleen
			ENCFF519CUG	ENCSR401KZW	Spleen
			ENCFF062OSA	ENCSR831EDZ	Spleen
			ENCFF211AYM	ENCSR831EDZ	Spleen
			ENCFF748QKW	ENCSR831EDZ	Spleen
			ENCFF863PEY	ENCSR831EDZ	Spleen
			ENCFF145BFG	ENCSR831EDZ	Spleen
			ENCFF333DPR	ENCSR831EDZ	Spleen
			ENCFF858BUR	ENCSR831EDZ	Spleen
			ENCFF338WGI	ENCSR831EDZ	Spleen
			ENCFF195TZF	ENCSR831EDZ	Spleen
			ENCFF536JYM	ENCSR831EDZ	Spleen
			ENCFF556UIO	ENCSR831EDZ	Spleen
			ENCFF132RBT	ENCSR831EDZ	Spleen
			ENCFF310LIA	ENCSR928BGP	Spleen
			ENCFF803XJL	ENCSR928BGP	Spleen
			ENCFF963TVU	ENCSR928BGP	Spleen
			ENCFF561PXV	ENCSR928BGP	Spleen
			ENCFF443ISP	ENCSR928BGP	Spleen
			ENCFF939IRO	ENCSR928BGP	Spleen
			ENCFF931HXM	ENCSR928BGP	Spleen
			ENCFF256ZDS	ENCSR928BGP	Spleen
			ENCFF255NTL	ENCSR928BGP	Spleen
			ENCFF876EJJ	ENCSR928BGP	Spleen
			ENCFF835UBU	ENCSR928BGP	Spleen
			ENCFF465GDE	ENCSR928BGP	Spleen
			ENCFF523NEP	ENCSR928BGP	Spleen
			ENCFF628NEM	ENCSR928BGP	Spleen
			ENCFF985LSB	ENCSR479APW	Spleen
			ENCFF568EQY	ENCSR479APW	Spleen
			ENCFF321EMS	ENCSR479APW	Spleen
			ENCFF307XXR	ENCSR479APW	Spleen
			ENCFF530LJM	ENCSR479APW	Spleen
			ENCFF877QCC	ENCSR479APW	Spleen
			ENCFF656QUH	ENCSR479APW	Spleen
			ENCFF955IYD	ENCSR479APW	Spleen
			ENCFF236LSX	ENCSR556QXD	Spleen
			ENCFF554TAG	ENCSR556QXD	Spleen
			ENCFF706QXQ	ENCSR556QXD	Spleen
			ENCFF625TUB	ENCSR556QXD	Spleen
			ENCFF790COZ	ENCSR556QXD	Spleen
			ENCFF154TAH	ENCSR556QXD	Spleen
			ENCFF557HAR	ENCSR556QXD	Spleen
			ENCFF432BXW	ENCSR556QXD	Spleen
			ENCFF793ZSN	ENCSR556QXD	Spleen
			ENCFF281JUB	ENCSR556QXD	Spleen
			ENCFF316RMX	ENCSR556QXD	Spleen
			ENCFF352SSW	ENCSR556QXD	Spleen
			ENCFF214TTF	ENCSR556QXD	Spleen
			ENCFF540QNU	ENCSR556QXD	Spleen
			ENCFF794EUA	ENCSR341AXR	Spleen
			ENCFF614BCL	ENCSR341AXR	Spleen
			ENCFF722RKO	ENCSR341AXR	Spleen
			ENCFF477WIT	ENCSR341AXR	Spleen
			ENCFF529WKL	ENCSR341AXR	Spleen
			ENCFF016XSG	ENCSR341AXR	Spleen
			ENCFF231JNL	ENCSR341AXR	Spleen
			ENCFF050GYG	ENCSR341AXR	Spleen
			ENCFF178OBP	ENCSR341AXR	Spleen
			ENCFF160XAH	ENCSR341AXR	Spleen
			ENCFF457PXB	ENCSR341AXR	Spleen
			ENCFF397THP	ENCSR341AXR	Spleen
			ENCFF343GHL	ENCSR407UEE	Spleen
			ENCFF458GJE	ENCSR407UEE	Spleen
			ENCFF972YPF	ENCSR407UEE	Spleen
			ENCFF014LLP	ENCSR407UEE	Spleen
			ENCFF848VRN	ENCSR407UEE	Spleen
			ENCFF398AIY	ENCSR407UEE	Spleen
			ENCFF167KGV	ENCSR407UEE	Spleen
			ENCFF924DGL	ENCSR407UEE	Spleen
			ENCFF992MKQ	ENCSR407UEE	Spleen
			ENCFF765OAK	ENCSR407UEE	Spleen
			ENCFF230IRL	ENCSR407UEE	Spleen
			ENCFF681OYD	ENCSR407UEE	Spleen
			ENCFF020BWZ	ENCSR768RIK	Spleen
			ENCFF067GIS	ENCSR768RIK	Spleen
			ENCFF914DVP	ENCSR768RIK	Spleen
			ENCFF817YKW	ENCSR768RIK	Spleen
			ENCFF520VEB	ENCSR768RIK	Spleen
			ENCFF454TXS	ENCSR768RIK	Spleen
			ENCFF836EHO	ENCSR768RIK	Spleen
			ENCFF095QFN	ENCSR768RIK	Spleen
			ENCFF125KPT	ENCSR708TAB	Spleen
			ENCFF365ESF	ENCSR708TAB	Spleen
			ENCFF782ROP	ENCSR708TAB	Spleen
			ENCFF444RVE	ENCSR708TAB	Spleen
			ENCFF341AVL	ENCSR708TAB	Spleen
			ENCFF825RYC	ENCSR708TAB	Spleen
			ENCFF281KPA	ENCSR708TAB	Spleen
			ENCFF913NRA	ENCSR708TAB	Spleen
			ENCFF823AVZ	ENCSR747JSA	Spleen
			ENCFF767UVL	ENCSR747JSA	Spleen
			ENCFF683MXU	ENCSR747JSA	Spleen
			ENCFF730WMX	ENCSR747JSA	Spleen
			ENCFF325PTU	ENCSR747JSA	Spleen
			ENCFF946VFS	ENCSR747JSA	Spleen
			ENCFF663WAK	ENCSR747JSA	Spleen
			ENCFF720VSJ	ENCSR747JSA	Spleen
			ENCFF462AHN	ENCSR801KDK	Spleen
			ENCFF287DDM	ENCSR801KDK	Spleen
			ENCFF556TBH	ENCSR801KDK	Spleen
			ENCFF875MVP	ENCSR801KDK	Spleen
			ENCFF630VMQ	ENCSR801KDK	Spleen
			ENCFF114MFG	ENCSR801KDK	Spleen
			ENCFF172TJY	ENCSR801KDK	Spleen
			ENCFF913NRE	ENCSR801KDK	Spleen
			ENCFF569GLO	ENCSR801KDK	Spleen
			ENCFF008UXH	ENCSR801KDK	Spleen
			ENCFF312BIP	ENCSR801KDK	Spleen
			ENCFF873MET	ENCSR801KDK	Spleen
			ENCFF896XSQ	ENCSR122MPC	Spleen
			ENCFF140LEG	ENCSR122MPC	Spleen
			ENCFF738OJC	ENCSR122MPC	Spleen
			ENCFF864NKH	ENCSR122MPC	Spleen
			ENCFF974VJF	ENCSR122MPC	Spleen
			ENCFF243YGR	ENCSR122MPC	Spleen
			ENCFF538LDJ	ENCSR122MPC	Spleen
			ENCFF288NRR	ENCSR122MPC	Spleen
			ENCFF398IYL	ENCSR122MPC	Spleen
			ENCFF032UEK	ENCSR122MPC	Spleen
			ENCFF109ARY	ENCSR122MPC	Spleen
			ENCFF005NPX	ENCSR122MPC	Spleen
			ENCFF306ZIE	ENCSR123ASL	Spleen
			ENCFF873KMX	ENCSR123ASL	Spleen
			ENCFF342YHZ	ENCSR123ASL	Spleen
			ENCFF893QUE	ENCSR123ASL	Spleen
			ENCFF801TDN	ENCSR123ASL	Spleen
			ENCFF689XYL	ENCSR123ASL	Spleen
			ENCFF323ZQH	ENCSR123ASL	Spleen
			ENCFF856AHW	ENCSR123ASL	Spleen
			ENCFF968TLC	ENCSR676FAM	Spleen
			ENCFF302XSK	ENCSR676FAM	Spleen
			ENCFF419IMW	ENCSR676FAM	Spleen
			ENCFF275XBH	ENCSR676FAM	Spleen
			ENCFF969VZD	ENCSR676FAM	Spleen
			ENCFF632PXA	ENCSR676FAM	Spleen
			ENCFF096VSH	ENCSR676FAM	Spleen
			ENCFF233DBJ	ENCSR676FAM	Spleen
			ENCFF235AXZ	ENCSR564WJA	Spleen
			ENCFF879ZCL	ENCSR564WJA	Spleen
			ENCFF121CDZ	ENCSR564WJA	Spleen
			ENCFF805XNT	ENCSR564WJA	Spleen
			ENCFF808LUK	ENCSR564WJA	Spleen
			ENCFF453JRN	ENCSR564WJA	Spleen
			ENCFF740RUL	ENCSR564WJA	Spleen
			ENCFF519TMX	ENCSR564WJA	Spleen
			ENCFF358JMZ	ENCSR922KKS	Spleen
			ENCFF647YDE	ENCSR922KKS	Spleen
			ENCFF148AEP	ENCSR922KKS	Spleen
			ENCFF823SMK	ENCSR922KKS	Spleen
			ENCFF370DLX	ENCSR922KKS	Spleen
			ENCFF790DPW	ENCSR922KKS	Spleen
			ENCFF710VRU	ENCSR922KKS	Spleen
			ENCFF605FUO	ENCSR922KKS	Spleen
			ENCFF053CBZ	ENCSR204OJS	Stomach
			ENCFF394YBR	ENCSR204OJS	Stomach
			ENCFF765XNJ	ENCSR204OJS	Stomach
			ENCFF303NHQ	ENCSR204OJS	Stomach
			ENCFF564PES	ENCSR204OJS	Stomach
			ENCFF851QYW	ENCSR204OJS	Stomach
			ENCFF164WZS	ENCSR237GVU	Stomach
			ENCFF115IHW	ENCSR237GVU	Stomach
			ENCFF398GMM	ENCSR237GVU	Stomach
			ENCFF400YMD	ENCSR237GVU	Stomach
			ENCFF187DDE	ENCSR965BLU	Stomach
			ENCFF574ZEC	ENCSR965BLU	Stomach
			ENCFF002UIW	ENCSR965BLU	Stomach
			ENCFF206IIM	ENCSR965BLU	Stomach
			ENCFF471EPP	ENCSR475TRZ	Stomach
			ENCFF201ILK	ENCSR475TRZ	Stomach
			ENCFF532TFQ	ENCSR475TRZ	Stomach
			ENCFF287ZUG	ENCSR475TRZ	Stomach
			ENCFF819PQP	ENCSR475TRZ	Stomach
			ENCFF224QXU	ENCSR475TRZ	Stomach
			ENCFF297CEL	ENCSR357ROS	Stomach
			ENCFF127WEL	ENCSR357ROS	Stomach
			ENCFF233VYG	ENCSR357ROS	Stomach
			ENCFF390PQU	ENCSR357ROS	Stomach
			ENCFF275FTE	ENCSR357ROS	Stomach
			ENCFF468GVC	ENCSR357ROS	Stomach
			ENCFF604RQR	ENCSR357ROS	Stomach
			ENCFF886CTF	ENCSR357ROS	Stomach
			ENCFF854WWM	ENCSR357ROS	Stomach
			ENCFF258NZF	ENCSR357ROS	Stomach
			ENCFF379OLC	ENCSR357ROS	Stomach
			ENCFF479NCS	ENCSR357ROS	Stomach
			ENCFF848VRD	ENCSR158WBG	Stomach
			ENCFF471UAJ	ENCSR158WBG	Stomach
			ENCFF044KYF	ENCSR158WBG	Stomach
			ENCFF990WYX	ENCSR158WBG	Stomach
			ENCFF128GRD	ENCSR063HOI	Stomach
			ENCFF268TDD	ENCSR063HOI	Stomach
			ENCFF671URC	ENCSR063HOI	Stomach
			ENCFF780JZQ	ENCSR063HOI	Stomach
			ENCFF877RDK	ENCSR063HOI	Stomach
			ENCFF598LZD	ENCSR063HOI	Stomach
			ENCFF856KHQ	ENCSR063HOI	Stomach
			ENCFF857PEB	ENCSR063HOI	Stomach
			ENCFF797TMM	ENCSR195JWZ	Stomach
			ENCFF076MFG	ENCSR195JWZ	Stomach
			ENCFF011ZFX	ENCSR195JWZ	Stomach
			ENCFF002OYV	ENCSR195JWZ	Stomach
			ENCFF068YLR	ENCSR364YAY	Stomach
			ENCFF950YGA	ENCSR364YAY	Stomach
			ENCFF595MZQ	ENCSR364YAY	Stomach
			ENCFF942QHO	ENCSR364YAY	Stomach
			ENCFF504OAO	ENCSR219QSM	Stomach
			ENCFF242LHT	ENCSR219QSM	Stomach
			ENCFF633AMB	ENCSR219QSM	Stomach
			ENCFF838GTZ	ENCSR219QSM	Stomach
			ENCFF913JTP	ENCSR219QSM	Stomach
			ENCFF082LVB	ENCSR219QSM	Stomach
			ENCFF533ACB	ENCSR238SWA	Stomach
			ENCFF842JCI	ENCSR238SWA	Stomach
			ENCFF784FEA	ENCSR238SWA	Stomach
			ENCFF212BFI	ENCSR238SWA	Stomach
			ENCFF173HBF	ENCSR238SWA	Stomach
			ENCFF544IKO	ENCSR238SWA	Stomach
			ENCFF005HYM	ENCSR007GED	Stomach
			ENCFF924GYP	ENCSR007GED	Stomach
			ENCFF688AOU	ENCSR007GED	Stomach
			ENCFF622KGH	ENCSR007GED	Stomach
			ENCFF553TAG	ENCSR787TQW	Stomach
			ENCFF568GGY	ENCSR787TQW	Stomach
			ENCFF108QSA	ENCSR787TQW	Stomach
			ENCFF503ZRM	ENCSR787TQW	Stomach
			ENCFF166SND	ENCSR872WVR	Stomach
			ENCFF933SBD	ENCSR872WVR	Stomach
			ENCFF367NUF	ENCSR872WVR	Stomach
			ENCFF691CRM	ENCSR872WVR	Stomach
			ENCFF689CYF	ENCSR872WVR	Stomach
			ENCFF347UYT	ENCSR872WVR	Stomach
			ENCFF697DBC	ENCSR489ZLL	Stomach
			ENCFF033EFF	ENCSR489ZLL	Stomach
			ENCFF992XVC	ENCSR489ZLL	Stomach
			ENCFF642DZU	ENCSR489ZLL	Stomach
			ENCFF826IUR	ENCSR510NXV	Stomach
			ENCFF705OAP	ENCSR510NXV	Stomach
			ENCFF155HRA	ENCSR510NXV	Stomach
			ENCFF021AZX	ENCSR510NXV	Stomach
			ENCFF450YJM	ENCSR510NXV	Stomach
			ENCFF831YTJ	ENCSR510NXV	Stomach
			ENCFF624IBM	ENCSR939CJE	Stomach
			ENCFF005MNS	ENCSR939CJE	Stomach
			ENCFF004GDT	ENCSR939CJE	Stomach
			ENCFF188ISS	ENCSR939CJE	Stomach
			ENCFF864UBH	ENCSR677LBH	Stomach
			ENCFF144BTL	ENCSR677LBH	Stomach
			ENCFF220NMY	ENCSR677LBH	Stomach
			ENCFF488BKS	ENCSR677LBH	Stomach
			ENCFF364KRK	ENCSR009RJD	Stomach
			ENCFF584ZUY	ENCSR009RJD	Stomach
			ENCFF580WSQ	ENCSR009RJD	Stomach
			ENCFF075LMT	ENCSR009RJD	Stomach
			ENCFF772WSE	ENCSR493MQY	Stomach
			ENCFF536OIV	ENCSR493MQY	Stomach
			ENCFF706XCE	ENCSR493MQY	Stomach
			ENCFF022FMP	ENCSR493MQY	Stomach
			ENCFF312ACW	ENCSR025CGR	Stomach
			ENCFF710UNG	ENCSR025CGR	Stomach
			ENCFF585IMU	ENCSR316LNO	Stomach
			ENCFF878STL	ENCSR316LNO	Stomach
			ENCFF917VAP	ENCSR316LNO	Stomach
			ENCFF839BLY	ENCSR316LNO	Stomach
			ENCFF969RFG	ENCSR316LNO	Stomach
			ENCFF099PUQ	ENCSR316LNO	Stomach
			ENCFF065THC	ENCSR316LNO	Stomach
			ENCFF272AFL	ENCSR316LNO	Stomach
			ENCFF024KFQ	ENCSR316LNO	Stomach
			ENCFF488NZH	ENCSR316LNO	Stomach
			ENCFF830MMV	ENCSR037GFN	Stomach
			ENCFF679YQH	ENCSR037GFN	Stomach
			ENCFF266WRU	ENCSR037GFN	Stomach
			ENCFF615KYA	ENCSR037GFN	Stomach
			ENCFF697HQL	ENCSR843UEZ	Stomach
			ENCFF872WHF	ENCSR843UEZ	Stomach
			ENCFF403BFH	ENCSR843UEZ	Stomach
			ENCFF584JSJ	ENCSR843UEZ	Stomach
			ENCFF471AGX	ENCSR600TOW	Stomach
			ENCFF900HAH	ENCSR600TOW	Stomach
			ENCFF492SQJ	ENCSR600TOW	Stomach
			ENCFF716IXG	ENCSR600TOW	Stomach
			ENCFF611JBQ	ENCSR330MAM	Stomach
			ENCFF860EWD	ENCSR330MAM	Stomach
			ENCFF635YFZ	ENCSR330MAM	Stomach
			ENCFF597GMZ	ENCSR330MAM	Stomach
			ENCFF746EJK	ENCSR751BHO	Stomach
			ENCFF862SNF	ENCSR751BHO	Stomach
			ENCFF539VAQ	ENCSR751BHO	Stomach
			ENCFF608CMJ	ENCSR751BHO	Stomach
			ENCFF155WGH	ENCSR227DGG	Stomach
			ENCFF554OQH	ENCSR227DGG	Stomach
			ENCFF810EJG	ENCSR227DGG	Stomach
			ENCFF629QMS	ENCSR227DGG	Stomach
			ENCFF374PCD	ENCSR492BHN	Stomach
			ENCFF657ZEM	ENCSR492BHN	Stomach
			ENCFF102TLD	ENCSR492BHN	Stomach
			ENCFF026EML	ENCSR492BHN	Stomach
			ENCFF365YLF	ENCSR492BHN	Stomach
			ENCFF949GBA	ENCSR492BHN	Stomach
			ENCFF628GCG	ENCSR133NBJ	Stomach
			ENCFF964NOS	ENCSR133NBJ	Stomach
			ENCFF721ABO	ENCSR903QBX	Stomach
			ENCFF148DTG	ENCSR903QBX	Stomach
			ENCFF681NWK	ENCSR903QBX	Stomach
			ENCFF540OQG	ENCSR903QBX	Stomach
			ENCFF113JDT	ENCSR166CNR	Stomach
			ENCFF058KWR	ENCSR166CNR	Stomach
			ENCFF872MED	ENCSR166CNR	Stomach
			ENCFF433CTC	ENCSR166CNR	Stomach
			ENCFF620ZYV	ENCSR166CNR	Stomach
			ENCFF373LQA	ENCSR166CNR	Stomach
			ENCFF701OMU	ENCSR166CNR	Stomach
			ENCFF426LJW	ENCSR166CNR	Stomach
			ENCFF558DCK	ENCSR166CNR	Stomach
			ENCFF250THO	ENCSR166CNR	Stomach
			ENCFF038WKM	ENCSR353MNV	Stomach
			ENCFF906LCA	ENCSR353MNV	Stomach
			ENCFF205OAV	ENCSR353MNV	Stomach
			ENCFF787SDZ	ENCSR353MNV	Stomach
			ENCFF260PYL	ENCSR944KAZ	Stomach
			ENCFF718MGE	ENCSR944KAZ	Stomach
			ENCFF003HGP	ENCSR944KAZ	Stomach
			ENCFF753SNQ	ENCSR944KAZ	Stomach
			ENCFF242ZCV	ENCSR552ICY	Stomach
			ENCFF033PTW	ENCSR552ICY	Stomach
			ENCFF073RIM	ENCSR552ICY	Stomach
			ENCFF221OWE	ENCSR552ICY	Stomach
			ENCFF054ZLW	ENCSR546HZF	Stomach
			ENCFF836ESO	ENCSR546HZF	Stomach
			ENCFF922SIA	ENCSR546HZF	Stomach
			ENCFF594DTQ	ENCSR546HZF	Stomach
			ENCFF985ZLE	ENCSR546HZF	Stomach
			ENCFF957RVD	ENCSR546HZF	Stomach
			ENCFF252RIL	ENCSR819DOR	Stomach
			ENCFF691EFS	ENCSR819DOR	Stomach
			ENCFF193IAX	ENCSR819DOR	Stomach
			ENCFF078XOC	ENCSR819DOR	Stomach
			ENCFF630HBK	ENCSR503XFW	Stomach
			ENCFF165KVY	ENCSR503XFW	Stomach
			ENCFF027XZS	ENCSR503XFW	Stomach
			ENCFF997OAY	ENCSR503XFW	Stomach
			ENCFF503JSQ	ENCSR503XFW	Stomach
			ENCFF109LEO	ENCSR503XFW	Stomach
			ENCFF434LVM	ENCSR503XFW	Stomach
			ENCFF050PXS	ENCSR503XFW	Stomach
			ENCFF903PKQ	ENCSR134KZX	Stomach
			ENCFF022HKC	ENCSR134KZX	Stomach
			ENCFF629RSB	ENCSR134KZX	Stomach
			ENCFF365CXO	ENCSR134KZX	Stomach

## Sheet: ST-2 Filtering criteria
ChIP quality control metrics	Index	Good	Acceptible	Bad
Number of reads (narrow)	Reads	20000000	10000000
Number of reads (broad)	Reads	45000000	45,000,000>Reads>20,000,000
Reads in peaks	RiP%		>0.5%
Non-redundant fraction	NRF	>0.9	0.9>NRF>0.5
PCR-bottlenecking coefficient 1	PBC1	>0.9	0.9>PBC1>0.5
PCR-bottlenecking coefficient 2	PBC2	>10	10>PBC2>1
Normalized strand cross-correlation coefficient	NSC	>1.1	>1.05
Relative strand cross-correlation coefficient	RSC	>1	>0.8

## Sheet: ST-3 Antibodies
Name	Manufacturer	Lot #
Monoclonal Anti-Flag M2 antibody produced in mouse	Sigma-Aldrich	#F3165
IGF2BP3 Monoclonal Antibody (OTI4H5)	Invitrogen	#MA5-27480
β-Actin (D6A8) Rabbit mAb	CST	#8457
Phospho-Histone H2A.X (Ser139) Rabbit mAb	CST	#9718
p21 Waf1/Cip1 (12D1) Rabbit mAb	CST	#2947
TNF-α (D5G9) Rabbit mAb	CST	#6945
MMP-3 (D7F5B) Rabbit mAb	CST	#14351
IL-6 (D3K2N) Rabbit mAb	CST	#12153
Goad anti-Rabbit IgG (H+L) Cross-Adsorbed Secondary Antibody, DyLight 594	Invitrogen	#35561
Anti-Histone H3 (acetyl K27) antibody - ChIP Grade	Abcam	#ab4729
Anti-mouse IgG, HRP-linked Antibody	CST	#7076
Anti-rabbit IgG, HRP-linked Antibody	CST	#7074

## Sheet: ST-4 Primers
Primer	Sequence (5' - 3')	Comment
TRA2A-pro-F	GATGGCTCCAGAGGTTG	Primers to amplify TRA2A core promoter and TRA2A enhancer
TRA2A-pro-R	CCTAGATAGCGCCACTGC
TRA2A-enh-F	AGCTTGAATCAGAGGCAAC
TRA2A-enh-R	TAGCTCCCAATTACTGAGGTC
FLuc_F	AACACCCCAACATCTTCGAC	Primers to validate the expression of firefly and Renilla luciferase
FLuc_R	TCGCGGTTGTTACTTGACTG
RLuc_F	TGGCTTCCAAGGTGTACGAC
RLuc_R	GTTCTCCGCATGTTTCTCGC
TRA2A-CDS-F	ATGAGTGATGTGGAGGAAAACA	Primers to amplify the complete CDS of TRA2A for overexpression
TRA2A-CDS-R	TCAATAGCGTCTTGGGCTGTA
Anchor	CGTAGTACATGCACAGATGAGG	Primers for 3C
3C-region1	TCCCGTAGGAGCAATTTGAC
3C-region2	ATTACAGTGAAGCACAGAGAGG
3C-region3	ACAGAGCGAGACTCCATCTCC
3C-region4	TCATCTGCTTCACCTCAGTAAC
3C-region5	GGCATGTGGTGACCTCGTTT
3C-region6	CTTCCTTCCTTCCTGGCTAATC
3C-region7	GGCTAGTATGTCAACTGTGTTAC
3C-region8	TTGCAGCCATACTCCGTAAC
3C-region9	AAGGCTGGTCTTGAACTCCT
3C-region10	GGGTTGTCCTTCACTGATTAAG
3C-region11	CCACTCCATGAGATCAACAG
3C-region12	CTGTGATTTAGCTGACAAGCC
3C-region13	GCCTGGTTGAAACCTAGACTG
3C-region14	CAGCTATTCAGGAGGCTAAGG
3C-region15	CCCTCCTCCCATGTTTCATTC
3C-region16	TACTGGTACTCCCTTCAGTGAC
3C-region17	GCTGGTCTCAAACTCCTGAC
3C-region18	GGGAGAGGAGAACAACTGAAAG
3C-region19	AGGCTAGTCTCGAACTCCTAAC
3C-region20	GTACACTGCTCGGGTATTGG
4C-reading primer	TTCACCAGGAAGGGTCCC	Primers for 4C-seq
4C-inverse primer	GAAGGCTGCGTTGGGGTC
IGF2BP3-qPCR-F	TCGTGACCAGACACCTGATGAG	Primers to assess mRNA expression of IGF2BP3 and TRA2A
IGF2BP3-qPCR-R	GGTGCTGCTTTACCTGAGTCAG
TRA2A-qPCR-F	AATCGGAGAGCAGGTCAGGATC
TRA2A-qPCR-R	GAGAATGTCTCCTTGACCTCGAC
telo-F	CGGTTTGTTTGGGTTTGGGTTTGGGTTTGGGTTTGGGTT	Primers to evaluate relative telomere length
telo-R	GGCTTGCCTTACCCTTACCCTTACCCTTACCCTTACCCT
36B4-F	CAGCAAGTGGGAAGGTGTAATCC
36B4-R	CCCATTCTATCATCAACGGGTACAA
H3K27ac-ChIP-F	TCGCCCTCACCCAGCAAC	Primers to validate H3K27ac enrichment at IGF2BP3 promoter region
H3K27ac-ChIP-R	AAGACTGGCTACGCGTTCGT

## Sheet: ST-5 Other sequences
Name	Sequence (5' - 3')	Comment	Manufacturer (Cat #)
sgRNA-1	AGCGCCGTAAATAACGACCG	H3K27ac knockdown at the region near IGF2BP3 promoter region
sgRNA-2	CCCACCTGAAAGCGCCTCGA
Stealth siRNA of TRA2A	NA	TRA2A knockdown	Invitrogen (#HSS121028)
MISSION esiRNA of TRA2A	NA		Sigma-Aldrich (EHU137681)
