# Supplementary material for: Histone Modification Clocks for Robust Cross-Species Biological Age Prediction and Elucidating Senescence Regulation
Source: Research Square preprint supplement (doi:10.21203/rs.3.rs-6718936/v1), 2025-05-28
Supplement: Supplementary file 2 [file d42b40e0b528e4ab2cfba173.xlsx]

## Sheet: Fig. 1g
	age-correlated peaks	background
promoter	3518	38310
non-promoter	5689	155331
Method: fisher.test Arguments: default Result: P < 2.2e-16

## Sheet: Fig. 2c
Age gap (Treatment - Control)
-0.798309
-4.10218
-1.6914
-2.37737
-3.93359
Method: t.test Arguments: mu = 0 Result: P = 0.02214

## Sheet: Fig. 3d
Group	ΔCt
12h	49.9
12h	60.06
12h	56.78
24h	55.21
24h	54.44
24h	59.23
48h	61.07
48h	53.78
48h	63.08
control	0.11
control	0.13
control	0.18
Method: t.test Arguments: default Results: 12h vs control: P = 0.00290 24h vs control: P = 0.00069 48h vs control: P = 0.00227

## Sheet: Fig. 3e
Group	Fold enrichment
control	14.78
control	12.54
control	15.23
dCas9-HDAC	0.87
dCas9-HDAC	2.04
dCas9-HDAC	1.37
Method: t.test Arguments: default Result: control vs. dCas9-HDAC: P = 0.001427

## Sheet: Fig. 3f
Group	ΔCt
control	1.28
control	1.16
control	1.11
dCas9-HDAC	1.08
dCas9-HDAC	1.25
dCas9-HDAC	1.2
Method: t.test Arguments: default Result: control vs. dCas9-HDAC: P = 0.9543

## Sheet: Fig. 3g
Group	Relative proliferation
control	1.655
control	1.625
control	1.625
control	1.574
control	1.638
control	1.759
control	1.773
control	1.692
control	1.699
control	1.62
control	1.562
control	1.635
dCas9-HDAC	0.16
dCas9-HDAC	0.127
dCas9-HDAC	0.198
dCas9-HDAC	0.14
dCas9-HDAC	0.188
dCas9-HDAC	0.106
dCas9-HDAC	0.134
dCas9-HDAC	0.18
dCas9-HDAC	0.238
dCas9-HDAC	0.143
dCas9-HDAC	0.148
dCas9-HDAC	0.162
Method: t.test Arguments: default Result: control vs. dCas9-HDAC: P < 2.2e-16

## Sheet: Fig. 3h
Group	Relative telomere length (T/S ratio)
control	1
control	1
control	1
dCas9-HDAC	0.754
dCas9-HDAC	0.776
dCas9-HDAC	0.734
Method: t.test Arguments: default Result: control vs. dCas9-HDAC: P = 0.002435

## Sheet: Fig. 3j
Group	Percent SA-β-Gal positive cells (%)
control	0
control	9.7561
control	5
control	0
control	2.5
control	0
control	2.7027
dCas9-HDAC	31.2849
dCas9-HDAC	45.977
dCas9-HDAC	19.1176
dCas9-HDAC	65.3061
dCas9-HDAC	37.7778
dCas9-HDAC	59.0164
dCas9-HDAC	72.9508
dCas9-HDAC	20.8955
Method: wilcox.test Arguments: default Result: control vs. dCas9-HDAC: P = 0.0008599

## Sheet: Fig. 3k
Group	Percent EdU positive cells (%)
control	34.8387
control	55.2381
control	46.0606
control	51.9774
control	40
control	52.8926
control	50.8333
control	59.707
dCas9-HDAC	16.6667
dCas9-HDAC	11.1475
dCas9-HDAC	10.0346
dCas9-HDAC	7.7551
dCas9-HDAC	7.87402
dCas9-HDAC	8.50202
dCas9-HDAC	11.1111
dCas9-HDAC	12.9496
Method: t.test Arguments: default Result: control vs. dCas9-HDAC: P = 7.038e-07

## Sheet: Fig. 3l
Group	Percent γH2AX positive cells (%)
control	1.64835
control	2.24719
control	0.546448
control	0
control	0.990099
control	0
control	0
control	0
dCas9-HDAC	8.82353
dCas9-HDAC	50
dCas9-HDAC	34.9206
dCas9-HDAC	10.4167
dCas9-HDAC	19.2982
dCas9-HDAC	42.8571
dCas9-HDAC	45.3125
dCas9-HDAC	39.3939
Method: wilcox.test Argument: default Result: control vs. dCas9-HDAC: P = 0.001053

[truncated: 10 more sheets: Fig. 4c, Fig. 4d, Fig. 4e, Fig. 4f, Fig. 4g, Fig. 4h, Fig. 4i, Fig. 4k, Fig. 5b, Extended Data Fig. 7]
